# Supplementary material for: Haemangiosarcoma in the Golden Retriever Lifetime Study: frequency, risk factors and post-diagnosis survival
Source: Research Square preprint supplement (doi:10.21203/rs.3.rs-7064010/v1), 2025-07-14
Supplement: Supplementary file 1 [file 73a32e724e53206c9095a23d.docx]

**Table A2- Univariable logistic regression of factors associated with a haemangiosarcoma diagnosis in Golden Retriever dogs in the Golden Retriever Lifetime Study cohort (n=3044).** Variables in bold indicate liberal significance at univariable (Likelihood ratio test, LRT p-value <0.2). OR indicates odds ratio and 95% CI indicates 95% confidence interval

| Group | Variable | Category | Case(%) | Non-cases(%) | OR(95%CI) | Wald p-value | LRT p-value |
| --- | --- | --- | --- | --- | --- | --- | --- |
| Demographics | **Age at endpoint** | >7-<9y | 123 (25.1%) | 189 (7.4%) | 1 (1 - 1) |  | <0.001 |
|  |  | <5y | 5 (1%) | 346 (13.5%) | 0.02 (0.01 - 0.06) | <0.001 |  |
|  |  | >5-<7y | 24 (4.9%) | 178 (7%) | 0.21 (0.13 - 0.34) | <0.001 |  |
|  |  | >9-<11y | 231 (47.1%) | 683 (26.7%) | 0.52 (0.4 - 0.68) | <0.001 |  |
|  |  | >11-<13y | 104 (21.2%) | 1041 (40.8%) | 0.15 (0.11 - 0.21) | <0.001 |  |
|  |  | >13y | 3 (0.6%) | 117 (4.6%) | 0.04 (0.01 - 0.13) | <0.001 |  |
|  | **Age at endpoint (biological)** | >5-<8y | 67 (13.7%) | 264 (10.3%) | 1 (1 - 1) |  | <0.001 |
|  |  | <5y | 5 (1%) | 346 (13.5%) | 0.06 (0.02 - 0.14) | <0.001 |  |
|  |  | >8-<11y | 311 (63.5%) | 786 (30.8%) | 1.56 (1.16 - 2.1) | <0.01 |  |
|  |  | >11-<13y | 104 (21.2%) | 1041 (40.8%) | 0.39 (0.28 - 0.55) | <0.001 |  |
|  |  | >13y | 3 (0.6%) | 117 (4.6%) | 0.1 (0.03 - 0.33) | <0.001 |  |
|  | **Age at endpoint (quartiles)** | 0.74-<8.47 years | 112 (22.9%) | 649 (25.4%) | 1 (1 - 1) |  | <0.001 |
|  |  | >=8.47-<10.68 years | 241 (49.2%) | 517 (20.2%) | 2.7 (2.1 - 3.48) | <0.001 |  |
|  |  | >=10.68-<11.64 years | 81 (16.5%) | 683 (26.7%) | 0.69 (0.51 - 0.93) | 0.0161 |  |
|  |  | >=11.64-14.51 years | 56 (11.4%) | 705 (27.6%) | 0.46 (0.33 - 0.65) | <0.001 |  |
|  | **Age at neutering (quartiles)** | 0.15-<0.52y | 39 (8%) | 273 (10.7%) | 1 (1 - 1) |  | <0.001 |
|  |  | >=0.52-<0.83y | 40 (8.2%) | 272 (10.6%) | 1.03 (0.64 - 1.65) | 0.90 |  |
|  |  | >=0.83-2.44y | 63 (12.9%) | 250 (9.8%) | 1.76 (1.14 - 2.72) | 0.01 |  |
|  |  | >=2.44-9.59y | 52 (10.6%) | 261 (10.2%) | 1.39 (0.89 - 2.18) | 0.15 |  |
|  |  | Entire | 75 (15.3%) | 527 (20.6%) | 1 (0.66 - 1.51) | 0.99 |  |
|  |  | Not recorded | 221 (45.1%) | 971 (38%) | 1.59 (1.1 - 2.3) | 0.01 |  |
|  | **Sex neuter status** | Female Entire | 11 (2.2%) | 183 (7.2%) | 1 (1 - 1) |  | <0.001 |
|  |  | Female Neutered | 202 (41.2%) | 1108 (43.4%) | 3.03 (1.62 - 5.68) | <0.001 |  |
|  |  | Male Entire | 64 (13.1%) | 344 (13.5%) | 3.1 (1.59 - 6.01) | <0.001 |  |
|  |  | Male Neutered | 213 (43.5%) | 919 (36%) | 3.86 (2.06 - 7.21) | <0.001 |  |
|  | **Sex** | Female | 213 (43.5%) | 1291 (50.5%) | 1 (1 - 1) |  | <0.01 |
|  |  | Male | 277 (56.5%) | 1263 (49.5%) | 1.33 (1.09 - 1.62) | <0.01 |  |
|  | **Neuter status** | Entire | 75 (15.3%) | 527 (20.6%) | 1 (1 - 1) |  | <0.01 |
|  |  | Neutered | 415 (84.7%) | 2027 (79.4%) | 1.44 (1.1 - 1.87) | <0.01 |  |
|  | **Neutering reason – all dogs** | Elective | 374 (76.3%) | 1772 (69.4%) | 1 (1 - 1) |  | 0.04 |
|  |  | Medical Reason | 23 (4.7%) | 156 (6.1%) | 0.7 (0.44 - 1.1) | 0.12 |  |
|  |  | Entire | 83 (16.9%) | 555 (21.7%) | 0.71 (0.55 - 0.92) | <0.01 |  |
|  |  | Unknown | 1 (0.2%) | 8 (0.3%) | 0.59 (0.07 - 4.75) | 0.62 |  |
|  |  | Not recorded | 9 (1.8%) | 63 (2.5%) | 0.68 (0.33 - 1.37) | 0.28 |  |
|  | Neutering reason – neutered dogs only | Elective | 23 (5.5%) | 156 (7.7%) | 0.7 (0.44 - 1.09) | 0.12 | 0.37 |
|  |  | Medical reason | 8 (1.9%) | 32 (1.6%) | 1.18 (0.54 - 2.59) | 0.68 |  |
|  |  | Unknown | 1 (0.2%) | 8 (0.4%) | 0.59 (0.07 - 4.74) | 0.62 |  |
|  |  | Not recorded | 9 (2.2%) | 63 (3.1%) | 0.68 (0.33 - 1.37) | 0.28 |  |
|  | Neutered ever bred – neutered dogs only | Never bred | 414 (99.8%) | 2022 (99.8%) | 1 (1 - 1) |  | 0.98 |
|  |  | Bred | 1 (0.2%) | 5 (0.2%) | 0.98 (0.11 - 8.38) | 0.98 |  |
|  | **Spayed while in heat- all dogs** | Not spayed while in heat | 162 (33.1%) | 883 (34.6%) | 1 (1 - 1) |  | <0.001 |
|  |  | Spayed while in heat | 40 (8.2%) | 225 (8.8%) | 0.97 (0.67 - 1.41) | 0.87 |  |
|  |  | Intact Female | 11 (2.2%) | 183 (7.2%) | 0.33 (0.17 - 0.62) | <0.001 |  |
|  |  | Male | 277 (56.5%) | 1263 (49.5%) | 1.2 (0.97 - 1.48) | 0.10 |  |
|  | Spayed while in heat- female neutered female dogs only | Not spayed while in heat | 162 (80.2%) | 883 (79.7%) | 1 (1 - 1) |  | 0.87 |
|  |  | Spayed while in heat | 40 (19.8%) | 225 (20.3%) | 0.97 (0.67 - 1.41) | 0.87 |  |
|  | Spayed while pregnant – all dogs | Not spayed while pregnant | 487 (99.4%) | 2548 (99.8%) | 1 (1 - 1) |  | 0.20 |
|  |  | Spayed while pregnant | 3 (0.6%) | 6 (0.2%) | 2.62 (0.65 - 10.49) | 0.18 |  |
|  | **Spayed while pregnant – neutered female dogs only** | Not spayed while pregnant | 199 (98.5%) | 1102 (99.5%) | 1 (1 - 1) |  | 0.18 |
|  |  | Spayed while pregnant | 3 (1.5%) | 6 (0.5%) | 2.77 (0.69 - 11.16) | 0.15 |  |
|  | **Prevent heat ever – all dogs** | Heat never prevented | 490 (100%) | 2549 (99.8%) | 1 (1 - 1) |  | 0.18 |
|  |  | Heat prevented | 0 (0%) | 5 (0.2%) | 0 (0 - Inf) | 0.96 |  |
|  | Prevent heat ever – female dogs only | Heat never prevented | 213 (100%) | 1286 (99.6%) | 1 (1 - 1) |  | 0.22 |
|  |  | Heat prevented | 0 (0%) | 5 (0.4%) | 0 (0 - Inf) | 0.97 | 0.22 |
|  | **No pregnancy ever – all dogs** | No pregnancy | 282 (57.6%) | 1291 (50.5%) | 1 (1 - 1) |  | <0.01 |
|  |  | Pregnancy | 208 (42.4%) | 1263 (49.5%) | 0.75 (0.62 - 0.92) | <0.01 |  |
|  | No pregnancy ever – female dogs only | No pregnancy | 5 (2.3%) | 28 (2.2%) | 1 (1 - 1) |  | 0.87 |
|  |  | Pregnancy | 208 (97.7%) | 1263 (97.8%) | 0.92 (0.35 - 2.42) | 0.87 |  |
|  | Sired litters naturally ever– all dogs | No litter sired | 482 (98.4%) | 2523 (98.8%) | 1 (1 - 1) |  | 0.45 |
|  |  | Any litter sired | 8 (1.6%) | 31 (1.2%) | 1.35 (0.62 - 2.96) | 0.45 |  |
|  | Sired litters naturally ever– male entire dogs only | No litter sired | 59 (92.2%) | 321 (93.3%) | 1 (1 - 1) |  | 0.74 |
|  |  | Any litter sired | 5 (7.8%) | 23 (6.7%) | 1.18 (0.43 - 3.23) | 0.74 |  |
|  |  |  |  |  |  |  |  |
|  | Sired litters natural ever then neutered – all dogs | No litter sired | 489 (99.8%) | 2550 (99.8%) | 1 (1 - 1) |  | 0.82 |
|  |  | Any litter sired | 1 (0.2%) | 4 (0.2%) | 1.3 (0.15 - 11.68) | 0.82 |  |
|  | Sired litters natural ever then neutered – male neutered dogs only | No litter sired | 212 (99.5%) | 915 (99.6%) | 1 (1 - 1) |  | 0.94 |
|  |  | Any litter sired | 1 (0.5%) | 4 (0.4%) | 1.08 (0.12 - 9.7) | 0.94 |  |
|  | Heats before neutering – all dogs | 0 heats | 114 (23.3%) | 676 (26.5%) | 1 (1 - 1) |  | 0.46 |
|  |  | 1 heats | 28 (5.7%) | 102 (4%) | 1.63 (1.02 - 2.59) | 0.03 |  |
|  |  | 10 heats | 0 (0%) | 1 (0%) | 0 (0 - Inf) | 0.97 |  |
|  |  | 12 heats | 0 (0%) | 1 (0%) | 0 (0 - Inf) | 0.97 |  |
|  |  | 2 heats | 10 (2%) | 63 (2.5%) | 0.94 (0.47 - 1.89) | 0.86 |  |
|  |  | 3 heats | 10 (2%) | 37 (1.4%) | 1.6 (0.78 - 3.31) | 0.20 |  |
|  |  | 4 heats | 14 (2.9%) | 49 (1.9%) | 1.69 (0.91 - 3.17) | 0.10 |  |
|  |  | 5 heats | 10 (2%) | 67 (2.6%) | 0.88 (0.44 - 1.77) | 0.73 |  |
|  |  | 6 heats | 6 (1.2%) | 47 (1.8%) | 0.76 (0.32 - 1.81) | 0.53 |  |
|  |  | 7 heats | 1 (0.2%) | 11 (0.4%) | 0.54 (0.07 - 4.22) | 0.56 |  |
|  |  | 8 heats | 1 (0.2%) | 2 (0.1%) | 2.96 (0.27 - 32.97) | 0.38 |  |
|  |  | Not recorded | 296 (60.4%) | 1498 (58.7%) | 1.17 (0.93 - 1.48) | 0.18 |  |
|  | Heats before neutering – female neutered dogs only | 0 heats | 114 (56.4%) | 676 (61%) | 1 (1 - 1) |  | 0.49 |
|  |  | 1 heats | 28 (13.9%) | 102 (9.2%) | 1.63 (1.02 - 2.59) | 0.039 |  |
|  |  | 10 heats | 0 (0%) | 1 (0.1%) | 0 (0 - Inf) | 0.98 |  |
|  |  | 12 heats | 0 (0%) | 1 (0.1%) | 0 (0 - Inf) | 0.98 |  |
|  |  | 2 heats | 10 (5%) | 63 (5.7%) | 0.94 (0.47 - 1.89) | 0.86 |  |
|  |  | 3 heats | 10 (5%) | 37 (3.3%) | 1.6 (0.78 - 3.31) | 0.20 |  |
|  |  | 4 heats | 14 (6.9%) | 49 (4.4%) | 1.69 (0.91 - 3.17) | 0.099 |  |
|  |  | 5 heats | 10 (5%) | 67 (6%) | 0.88 (0.44 - 1.77) | 0.73 |  |
|  |  | 6 heats | 6 (3%) | 47 (4.2%) | 0.76 (0.32 - 1.81) | 0.53 |  |
|  |  | 7 heats | 1 (0.5%) | 11 (1%) | 0.54 (0.07 - 4.22) | 0.56 |  |
|  |  | 8 heats | 1 (0.5%) | 2 (0.2%) | 2.96 (0.27 - 32.97) | 0.38 |  |
|  |  | Not recorded | 8 (4%) | 52 (4.7%) | 0.91 (0.42 - 1.97) | 0.81 |  |
|  | **Heats before neutering terciles – all dogs** | 0 heats | 114 (23.3%) | 676 (26.5%) | 1 (1 - 1) |  | <0.001 |
|  |  | 1-<=2 heats | 38 (7.8%) | 165 (6.5%) | 1.37 (0.91 - 2.05) | 0.13 |  |
|  |  | >2-<=4 heats | 24 (4.9%) | 86 (3.4%) | 1.65 (1.01 - 2.71) | 0.05 |  |
|  |  | >4-12 heats | 18 (3.7%) | 129 (5.1%) | 0.83 (0.49 - 1.41) | 0.49 |  |
|  |  | Intact Female | 11 (2.2%) | 183 (7.2%) | 0.36 (0.19 - 0.68) | <0.01 |  |
|  |  | Male | 277 (56.5%) | 1263 (49.5%) | 1.3 (1.03 - 1.65) | 0.03 |  |
|  |  | Not recorded | 8 (1.6%) | 52 (2%) | 0.91 (0.42 - 1.97) | 0.81 |  |
|  | **Heats before neutering terciles – female neutered dogs only** | 0 heats | 114 (56.4%) | 676 (61%) | 1 (1 - 1) |  | 0.15 |
|  |  | 1-<=2 heats | 38 (18.8%) | 165 (14.9%) | 1.37 (0.91 - 2.05) | 0.13 |  |
|  |  | >2-<=4 heats | 24 (11.9%) | 86 (7.8%) | 1.65 (1.01 - 2.71) | 0.05 |  |
|  |  | >4-12 heats | 18 (8.9%) | 129 (11.6%) | 0.83 (0.49 - 1.41) | 0.48 |  |
|  |  | Not recorded | 8 (4%) | 52 (4.7%) | 0.91 (0.42 - 1.97) | 0.81 |  |
|  | Pregnancy pre-neutering – all dogs | No pregnancy | 478 (97.6%) | 2481 (97.1%) | 1 (1 - 1) |  | 0.61 |
|  |  | Pregnancy | 12 (2.4%) | 73 (2.9%) | 0.85 (0.46 - 1.58) | 0.61 |  |
|  | Pregnancy pre-neutering – female neutered dogs only | No pregnancy | 190 (94.1%) | 1035 (93.4%) | 1 (1 - 1) |  | 0.73 |
|  |  | Pregnancy | 12 (5.9%) | 73 (6.6%) | 0.9 (0.48 - 1.68) | 0.73 |  |
|  | Number times bred before neutering – all dogs | >0-<3 times bred | 5 (1%) | 15 (0.6%) | 1 (1 - 1) |  | 0.24 |
|  |  | >=3-<9 times bred | 9 (1.8%) | 36 (1.4%) | 0.75 (0.22 - 2.61) | 0.65 |  |
|  |  | >=9-142 times bred | 10 (2%) | 28 (1.1%) | 1.07 (0.31 - 3.71) | 0.91 |  |
|  |  | Not bred | 466 (95.1%) | 2475 (96.9%) | 0.56 (0.2 - 1.56) | 0.27 |  |
|  | Number times bred before neutering terciles – neutered dogs only | >0-<3 times bred | 1 (0.2%) | 7 (0.3%) | 1 (1 - 1) |  | 0.30 |
|  |  | >=3-<9 times bred | 0 (0%) | 7 (0.3%) | 0 (0 - Inf) | 0.97 |  |
|  |  | >=9-142 times bred | 4 (1%) | 11 (0.5%) | 2.55 (0.23 - 27.71) | 0.44 |  |
|  |  | Not bred | 410 (98.8%) | 2002 (98.8%) | 1.43 (0.18 - 11.68) | 0.74 |  |
|  |  |  |  |  |  |  |  |
|  | Ever bred from – all dogs | Never bred from | 452 (92.2%) | 2393 (93.7%) | 1 (1 - 1) |  | 0.24 |
|  |  | Bred from | 38 (7.8%) | 161 (6.3%) | 1.25 (0.87 - 1.8) | 0.24 |  |
|  | **Average weight 5y prior to endpoint (quartiles)** | 12.47-<20.83kg | 76 (15.5%) | 474 (18.6%) | 1 (1 - 1) |  | <0.01 |
|  |  | >=20.83-<23.23kg | 56 (11.4%) | 494 (19.3%) | 0.71 (0.49 - 1.02) | 0.06 |  |
|  |  | >=23.23-26.98kg | 113 (23.1%) | 437 (17.1%) | 1.61 (1.17 - 2.22) | <0.01 |  |
|  |  | >=26.98-37.01kg | 158 (32.2%) | 393 (15.4%) | 2.51 (1.85 - 3.4) | <0.001 |  |
|  |  | Not recorded | 87 (17.8%) | 756 (29.6%) | 0.72 (0.52 - 1) | 0.05 |  |
|  | **Average weight 5y prior to endpoint (biological)** | >15-<=25kg | 183 (37.3%) | 1209 (47.3%) | 1 (1 - 1) |  | <0.001 |
|  |  | >25-<=35kg | 209 (42.7%) | 550 (21.5%) | 2.51 (2.01 - 3.14) | <0.001 |  |
|  |  | >35kg | 11 (2.2%) | 32 (1.3%) | 2.27 (1.12 - 4.58) | 0.02 |  |
|  |  | Not recorded | 87 (17.8%) | 763 (29.9%) | 0.75 (0.57 - 0.99) | 0.04 |  |
|  | **Median adult weight 5y prior to endpoint (complete records only, quartiles)** | 10.5-<16.1kg | 54 (11%) | 504 (19.7%) | 1 (1 - 1) |  | <0.001 |
|  | >=16.1-<21.3kg | 51 (10.4%) | 510 (20%) | 0.93 (0.62 - 1.4) | 0.74 |  |
|  | >=21.3-28.8kg | 135 (27.6%) | 424 (16.6%) | 2.97 (2.11 - 4.18) | <0.001 |  |
|  | >=28.8-47.1kg | 171 (34.9%) | 390 (15.3%) | 4.09 (2.93 - 5.71) | <0.001 |  |
|  | Not recorded | 79 (16.1%) | 726 (28.4%) | 1.02 (0.71 - 1.46) | 0.93 |  |
|  | **Median adult weight 5y prior to endpoint (any records, quartiles)** | 10.5-<17.1kg | 71 (14.5%) | 667 (26.1%) | 1 (1 - 1) |  | <0.001 |
|  | >=17.1-<24.7kg | 101 (20.6%) | 653 (25.6%) | 1.45 (1.05 - 2.01) | 0.02 |  |
|  | >=24.7-30.6kg | 159 (32.4%) | 587 (23%) | 2.54 (1.88 - 3.44) | <0.001 |  |
|  | >=30.6-49.1kg | 146 (29.8%) | 605 (23.7%) | 2.27 (1.67 - 3.07) | <0.001 |  |
|  | Not recorded | 13 (2.7%) | 42 (1.6%) | 2.91 (1.49 - 5.67) | <0.01 |  |
|  | **Median adult weight 5y prior to endpoint (complete records only, biological)** | >15-<=25kg | 121 (24.7%) | 911 (35.7%) | 1 (1 - 1) |  | <0.001 |
|  | >25-<=35kg | 218 (44.5%) | 484 (19%) | 3.39 (2.65 - 4.35) | <0.001 |  |
|  | >35kg | 35 (7.1%) | 107 (4.2%) | 2.46 (1.61 - 3.77) | <0.001 |  |
|  |  | Not recorded | 116 (23.7%) | 1052 (41.2%) | 0.83 (0.63 - 1.09) | 0.18 |  |
|  | **Median adult weight 5y prior to endpoint (any records, biological)** |  |  |  |  |  |  |
|  | >15-<=25kg | 135 (27.6%) | 1017 (39.8%) | 1 (1 - 1) |  | <0.001 |
|  | >25-<=35kg | 259 (52.9%) | 949 (37.2%) | 2.06 (1.64 - 2.58) | <0.001 |  |
|  | >35kg | 42 (8.6%) | 214 (8.4%) | 1.48 (1.01 - 2.15) | 0.04 |  |
|  | Not recorded | 54 (11%) | 374 (14.6%) | 1.09 (0.78 - 1.52) | 0.62 |  |
|  | **Average height 5y prior to endpoint (quartiles)** | >=56.30-<58.29cm | 95 (19.4%) | 373 (14.6%) | 1 (1 - 1) |  | <0.01 |
|  |  | >=58.29-<60.32cm | 99 (20.2%) | 362 (14.2%) | 1.07 (0.78 - 1.47) | 0.65 |  |
|  |  | >=60.32-67.73cm | 79 (16.1%) | 387 (15.2%) | 0.8 (0.58 - 1.12) | 0.19 |  |
|  |  | 49.80-<56.30cm | 86 (17.6%) | 373 (14.6%) | 0.91 (0.65 - 1.25) | 0.54 |  |
|  |  | Not recorded | 131 (26.7%) | 1059 (41.5%) | 0.49 (0.36 - 0.65) | <0.001 |  |
|  | **Average BCS 5y prior to endpoint (quartiles)** | 3.3-<5 | 51 (10.4%) | 287 (11.2%) | 1 (1 - 1) |  | 0.05 |
|  |  | >=5-<5.28 | 90 (18.4%) | 388 (15.2%) | 1.31 (0.9 - 1.9) | 0.16 |  |
|  |  | >=5.28-<5.86 | 63 (12.9%) | 378 (14.8%) | 0.94 (0.63 - 1.4) | 0.75 |  |
|  |  | >=5.86 - 9 | 53 (10.8%) | 373 (14.6%) | 0.8 (0.53 - 1.21) | 0.29 |  |
|  |  | Not recorded | 233 (47.6%) | 1128 (44.2%) | 1.16 (0.84 - 1.62) | 0.37 |  |
|  | **Mode BCS 5y prior to endpoint** | 5 | 253 (51.6%) | 1008 (39.5%) | 1 (1 - 1) |  | <0.001 |
|  |  | 3 | 0 (0%) | 3 (0.1%) | 0 (0 - Inf) | 0.97 |  |
|  |  | 4 | 22 (4.5%) | 106 (4.2%) | 0.83 (0.51 - 1.34) | 0.43 |  |
|  |  | 6 | 80 (16.3%) | 426 (16.7%) | 0.75 (0.57 - 0.99) | 0.04 |  |
|  |  | 7 | 44 (9%) | 151 (5.9%) | 1.16 (0.81 - 1.67) | 0.42 |  |
|  |  | 8 | 6 (1.2%) | 43 (1.7%) | 0.56 (0.23 - 1.32) | 0.18 |  |
|  |  | 9 | 1 (0.2%) | 13 (0.5%) | 0.31 (0.04 - 2.35) | 0.25 |  |
|  |  | Not recorded | 84 (17.1%) | 804 (31.5%) | 0.42 (0.32 - 0.54) | <0.001 |  |
|  | **Mode BCS prior to endpoint classified** | Ideal (BCS 4-5) | 275 (56.1%) | 1114 (43.6%) | 1 (1 - 1) |  | <0.001 |
|  |  | Not recorded | 84 (17.1%) | 804 (31.5%) | 0.42 (0.33 - 0.55) | <0.001 |  |
|  |  | Overweight (BCS 6-9) | 131 (26.7%) | 633 (24.8%) | 0.84 (0.67 - 1.05) | 0.13 |  |
|  |  | Underweight (BCS 0-3) | 0 (0%) | 3 (0.1%) | 0 (0 - Inf) | 0.96 |  |
| Lifestyle/activity | **Main lifestyle category – whole life** | Breed/showing | 8 (1.6%) | 70 (2.7%) | 1 (1 - 1) |  | 0.03 |
|  |  | Companion/pet | 444 (90.6%) | 2222(87.0%) | 1.75 (0.84 - 3.66) | 0.14 |  |
|  |  | Competitive | 24 (4.9%) | 211 (8.3%) | 1 (0.43 - 2.32) | 0.99 |  |
|  |  | Miscellaneous | 6 (1.2%) | 18 (0.7%) | 2.92 (0.9 - 9.48) | 0.07 |  |
|  |  | Working | 8 (1.6%) | 33 (1.3%) | 2.12 (0.73 - 6.15) | 0.16 |  |
|  | **Main lifestyle category 5 years prior** | Breed/showing | 7 (1.4%) | 52 (2%) | 1 (1 - 1) |  | <0.001 |
|  |  | Companion/pet | 435 (88.8%) | 2062 (80.7%) | 1.57 (0.71 - 3.47) | 0.27 |  |
|  |  | Competitive | 22 (4.5%) | 192 (7.5%) | 0.85 (0.34 - 2.1) | 0.73 |  |
|  |  | Miscellaneous | 6 (1.2%) | 15 (0.6%) | 2.97 (0.87 - 10.19) | 0.08 |  |
|  |  | Not recorded | 12 (2.4%) | 201 (7.9%) | 0.44 (0.17 - 1.18) | 0.10 |  |
|  |  | Working | 8 (1.6%) | 32 (1.3%) | 1.86 (0.61 - 5.61) | 0.27 |  |
|  | Daily USDA advised activity (30 min) – early life | Below USDA (<30 min) | 191 (39%) | 936 (36.6%) | 1 (1 - 1) |  | 0.38 |
|  |  | More than USDA (>30 min) | 294 (60%) | 1576 (61.7%) | 0.91 (0.75 - 1.12) | 0.38 |  |
|  |  | Not recorded | 5 (1%) | 42 (1.6%) | 0.58 (0.23 - 1.49) | 0.26 |  |
|  | Daily activity (1h) – early life | Below 1h | 423 (86.3%) | 2166 (84.8%) | 1 (1 - 1) |  | 0.47 |
|  |  | More than 1h | 62 (12.7%) | 346 (13.5%) | 0.92 (0.69 - 1.23) | 0.56 |  |
|  |  | Not recorded | 5 (1%) | 42 (1.6%) | 0.61 (0.24 - 1.55) | 0.29 |  |
|  | Daily activity KC (2h) – early life | Below KC (<2h) | 481 (98.2%) | 2500 (97.9%) | 1 (1 - 1) |  | 0.37 |
|  |  | More than KC (>2h) | 4 (0.8%) | 12 (0.5%) | 1.73 (0.56 - 5.39) | 0.34 |  |
|  |  | Not recorded | 5 (1%) | 42 (1.6%) | 0.62 (0.24 - 1.57) | 0.31 |  |
|  | **Whole life activity level mode** | Little | 25 (5.1%) | 97 (3.8%) | 1 (1 - 1) |  | <0.01 |
|  |  | Moderate | 361 (73.7%) | 1749 (68.5%) | 0.8 (0.51 - 1.26) | 0.34 |  |
|  |  | Very | 104 (21.2%) | 708 (27.7%) | 0.57 (0.35 - 0.93) | 0.02 |  |
|  | **Whole life activity level mean** | Mean (SD) | 66.9 (27.1) | 62.4 (25.5) | 1(1-1.01) |  | 0.16 |
|  | **Whole life activity level median** | Little | 24 (4.9%) | 88 (3.4%) | 1 (1 - 1) |  | 0.03 |
|  |  | Little to Moderate | 6 (1.2%) | 19 (0.7%) | 1.16 (0.42 - 3.22) | 0.78 |  |
|  |  | Moderate | 352 (71.8%) | 1726 (67.6%) | 0.75 (0.47 - 1.19) | 0.22 |  |
|  |  | Moderate to Very | 17 (3.5%) | 94 (3.7%) | 0.66 (0.33 - 1.32) | 0.24 |  |
|  |  | Very | 91 (18.6%) | 627 (24.5%) | 0.53 (0.32 - 0.88) | 0.01 |  |
|  | **Whole life activity minimum level** | Little | 136 (27.8%) | 573 (22.4%) | 1 (1 - 1) |  | <0.001 |
|  |  | Moderate | 327 (66.7%) | 1707 (66.8%) | 0.81 (0.65 - 1.01) | 0.06 |  |
|  |  | None | 1 (0.2%) | 7 (0.3%) | 0.6 (0.07 - 4.93) | 0.64 |  |
|  |  | Very | 26 (5.3%) | 267 (10.5%) | 0.41 (0.26 - 0.64) | <0.001 |  |
|  | Whole life activity maximum level | Little | 0 (0%) | 5 (0.2%) | 1 (1 - 1) |  | 0.37 |
|  |  | Moderate | 173 (35.3%) | 930 (36.4%) | 144954.26 (0 - Inf) | 0.96 |  |
|  |  | Very | 317 (64.7%) | 1619 (63.4%) | 152573.89 (0 - Inf) | 0.96 |  |
|  | **Eary life activity level mode** | Little | 7 (1.4%) | 38 (1.5%) | 1 (1 - 1) |  | 0.16 |
|  |  | Moderate | 288 (58.8%) | 1382 (54.1%) | 1.13 (0.5 - 2.56) | 0.76 |  |
|  |  | Very | 195 (39.8%) | 1134 (44.4%) | 0.93 (0.41 - 2.12) | 0.86 |  |
|  | **Early life activity level mean** | Mean (SD) | 6.7 (1.8) | 6.5 (1.8) | 0.96 (0.91-1.01) |  | 0.11 |
|  | **Early life activity level median** | Little | 7 (1.4%) | 36 (1.4%) | 1 (1 - 1) |  | 0.09 |
|  |  | Little to Moderate | 1 (0.2%) | 7 (0.3%) | 0.73 (0.08 - 6.94) | 0.79 |  |
|  |  | Moderate | 286 (58.4%) | 1365 (53.4%) | 1.08 (0.47 - 2.45) | 0.86 |  |
|  |  | Moderate to Very | 6 (1.2%) | 74 (2.9%) | 0.42 (0.13 - 1.33) | 0.13 |  |
|  |  | Very | 190 (38.8%) | 1072 (42%) | 0.91 (0.4 - 2.08) | 0.82 |  |
|  | **Early life activity minimum level** | Little | 29 (5.9%) | 112 (4.4%) | 1 (1 - 1) |  | 0.04 |
|  |  | Moderate | 353 (72%) | 1731 (67.8%) | 0.79 (0.52 - 1.2) | 0.27 |  |
|  |  | None | 0 (0%) | 2 (0.1%) | 0 (0 - Inf) | 0.96 |  |
|  |  | Very | 108 (22%) | 709 (27.8%) | 0.59 (0.37 - 0.93) | 0.02 |  |
|  | Early life activity maximum level | Little | 0 (0%) | 6 (0.2%) | 1 (1 - 1) |  | 0.34 |
|  |  | Moderate | 188 (38.4%) | 989 (38.7%) | 148125.35 (0 - Inf) | 0.95 |  |
|  |  | Very | 302 (61.6%) | 1559 (61%) | 150948.45 (0 - Inf) | 0.95 |  |
|  | **Rest of life activity level mode** | Little | 50 (10.2%) | 163 (6.4%) | 1 (1 - 1) |  | <0.001 |
|  |  | Moderate | 352 (71.8%) | 1586 (62.1%) | 0.72 (0.52 - 1.01) | 0.06 |  |
|  |  | No activity records for this time period | 10 (2%) | 416 (16.3%) | 0.08 (0.04 - 0.16) | <0.001 |  |
|  |  | Very | 78 (15.9%) | 389 (15.2%) | 0.65 (0.44 - 0.97) | 0.04 |  |
|  |  | Multi daily | 271 (55.3%) | 1357 (53.1%) | 423011.63 (0 - Inf) | 0.95 |  |
|  | **Rest of life activity level mean** | Mean (SD) | 44.4 (19.6) | 37.6 (16.4) | 0.98 (0.98 - 0.99) | <0.001 | <0.001 |
|  | **Rest of life activity level median** | Little | 46 (9.4%) | 152 (6%) | 1 (1 - 1) |  | <0.001 |
|  |  | Little to Moderate | 15 (3.1%) | 51 (2%) | 0.97 (0.5 - 1.89) | 0.93 |  |
|  |  | Moderate | 340 (69.4%) | 1536 (60.1%) | 0.73 (0.52 - 1.04) | 0.08 |  |
|  |  | Moderate to Very | 17 (3.5%) | 70 (2.7%) | 0.8 (0.43 - 1.5) | 0.49 |  |
|  |  | No activity records for this time period | 10 (2%) | 416 (16.3%) | 0.08 (0.04 - 0.16) | <0.001 |  |
|  |  | None to Little | 0 (0%) | 1 (0%) | 0 (0 - Inf) | 0.97 |  |
|  |  | Very | 62 (12.7%) | 328 (12.8%) | 0.62 (0.41 - 0.96) | 0.03 |  |
|  | **Rest of life activity level minimum** | Little | 133 (27.1%) | 539 (21.1%) | 1 (1 - 1) |  | <0.001 |
|  |  | Moderate | 323 (65.9%) | 1457 (57%) | 0.9 (0.72 - 1.12) | 0.35 |  |
|  |  | No activity records for this time period | 10 (2%) | 416 (16.3%) | 0.1 (0.05 - 0.19) | <0.001 |  |
|  |  | None | 1 (0.2%) | 5 (0.2%) | 0.81 (0.09 - 7) | 0.85 |  |
|  |  | Very | 23 (4.7%) | 137 (5.4%) | 0.68 (0.42 - 1.1) | 0.12 |  |
|  | **Rest of life activity level maximum** | Little | 19 (3.9%) | 52 (2%) | 1 (1 - 1) |  | <0.001 |
|  |  | Moderate | 310 (63.3%) | 1337 (52.3%) | 0.63 (0.37 - 1.09) | 0.10 |  |
|  |  | No activity records for this time period | 10 (2%) | 416 (16.3%) | 0.07 (0.03 - 0.15) | <0.001 |  |
|  |  | Very | 151 (30.8%) | 749 (29.3%) | 0.55 (0.32 - 0.96) | 0.03 |  |
|  | **5y prior to endpoint activity level mode** | Little | 46 (9.4%) | 160 (6.3%) | 1 (1 - 1) |  | <0.001 |
|  |  | Moderate | 355 (72.4%) | 1779 (69.7%) | 0.69 (0.49 - 0.98) | 0.04 |  |
|  |  | No activity records for this time period | 9 (1.8%) | 0 (0%) | 7367582.53 (0 - Inf) | 0.96 |  |
|  |  | Very | 80 (16.3%) | 615 (24.1%) | 0.45 (0.3 - 0.68) | <0.001 |  |
|  | **5y prior to endpoint activity level mean** | Mean (SD) | 40.5 (15.9) | 37.8 (15.4) | 0.99 (0.98 - 1) | <0.01 | <0.01 |
|  | **5y prior to endpoint activity level median** | Little | 41 (8.4%) | 149 (5.8%) | 1 (1 - 1) |  | <0.001 |
|  |  | Little to Moderate | 12 (2.4%) | 51 (2%) | 0.86 (0.42 - 1.75) | 0.67 |  |
|  |  | Moderate | 347 (70.8%) | 1712 (67%) | 0.74 (0.51 - 1.06) | 0.10 |  |
|  |  | Moderate to Very | 12 (2.4%) | 124 (4.9%) | 0.35 (0.18 - 0.7) | <0.01 |  |
|  |  | No activity records for this time period | 9 (1.8%) | 0 (0%) | 7697776.02 (0 - Inf) | 0.96 |  |
|  |  | Very | 69 (14.1%) | 518 (20.3%) | 0.48 (0.32 - 0.74) | <0.001 |  |
|  | **5y prior to endpoint activity level minimum** | Little | 134 (27.3%) | 555 (21.7%) | 1 (1 - 1) |  | <0.001 |
|  |  | Moderate | 324 (66.1%) | 1711 (67%) | 0.78 (0.63 - 0.98) | 0.03 |  |
|  |  | None | 1 (0.2%) | 6 (0.2%) | 0.69 (0.08 - 5.78) | 0.73 |  |
|  |  | No activity records for this time period | 9 (1.8%) | 0 (0%) | 8773058.86 (0 - Inf) | 0.95 |  |
|  |  | Very | 22 (4.5%) | 282 (11%) | 0.32 (0.2 - 0.52) | <0.001 |  |
|  | **5y prior to endpoint maximum activity level** | Little | 13 (2.7%) | 45 (1.8%) | 1 (1 - 1) |  | <0.001 |
|  |  | Moderate | 283 (57.8%) | 1436 (56.2%) | 0.68 (0.36 - 1.28) | 0.23 | <0.001 |
|  |  | No activity records for this time period | 9 (1.8%) | 0 (0%) | 7332161.46 (0 - Inf) | 0.96 | <0.001 |
|  |  | Very | 185 (37.8%) | 1073 (42%) | 0.6 (0.32 - 1.13) | 0.11 | <0.001 |
| Home/environment | MDI clinic quintile | 1 (least deprived) | 174 (35.5%) | 880 (34.5%) | 1 (1 - 1) |  | 0.77 |
|  |  | 2 | 98 (20%) | 568 (22.2%) | 0.87 (0.67 - 1.14) | 0.32 |  |
|  |  | 3 | 89 (18.2%) | 421 (16.5%) | 1.07 (0.81 - 1.42) | 0.64 |  |
|  |  | 4 | 36 (7.3%) | 215 (8.4%) | 0.85 (0.57 - 1.25) | 0.40 |  |
|  |  | 5 (most deprived) | 40 (8.2%) | 208 (8.1%) | 0.97 (0.67 - 1.42) | 0.88 |  |
|  |  | Not recorded | 53 (10.8%) | 262 (10.3%) | 1.02 (0.73 - 1.43) | 0.89 |  |
|  | MDI owner quintile | 1 (least deprived) | 196 (40%) | 963 (37.7%) | 1 (1 - 1) |  | 0.68 |
|  |  | 2 | 109 (22.2%) | 643 (25.2%) | 0.83 (0.65 - 1.07) | 0.15 |  |
|  |  | 3 | 83 (16.9%) | 461 (18.1%) | 0.88 (0.67 - 1.17) | 0.39 |  |
|  |  | 4 | 45 (9.2%) | 221 (8.7%) | 1 (0.7 - 1.43) | 0.99 |  |
|  |  | 5 (most deprived) | 44 (9%) | 211 (8.3%) | 1.02 (0.72 - 1.47) | 0.89 |  |
|  |  | Not recorded | 13 (2.7%) | 55 (2.2%) | 1.16 (0.62 - 2.17) | 0.64 |  |
|  | **Mode area type- 5y prior endpoint** | Not recorded | 12 (2.4%) | 201 (7.9%) | 1 (1 - 1) |  | <0.001 |
|  |  | Rural | 141 (28.8%) | 728 (28.5%) | 3.24 (1.76 - 5.97) | <0.001 |  |
|  |  | Suburban | 296 (60.4%) | 1427 (55.9%) | 3.47 (1.91 - 6.3) | <0.001 |  |
|  |  | Urban | 41 (8.4%) | 198 (7.8%) | 3.47 (1.77 - 6.8) | <0.001 |  |
|  | **Mode house type – 5y prior endpoint** | Apartment/condo/townhome | 33 (6.7%) | 131 (5.1%) | 1 (1 - 1) |  | <0.001 |
|  |  | Motor home | 0 (0%) | 2 (0.1%) | 0 (0 - Inf) | 0.96 |  |
|  |  | Not recorded | 12 (2.4%) | 201 (7.9%) | 0.24 (0.12 - 0.48) | <0.001 |  |
|  |  | Single family | 445 (90.8%) | 2220 (86.9%) | 0.8 (0.54 - 1.18) | 0.26 |  |
|  | **Mode water source- 5y prior to endpoint** | Municipal | 355 (72.4%) | 1718 (67.3%) | 1 (1 - 1) |  | <0.001 |
|  |  | Not recorded | 12 (2.4%) | 201 (7.9%) | 0.29 (0.16 - 0.52) | <0.001 |  |
|  |  | Other | 5 (1%) | 18 (0.7%) | 1.34 (0.5 - 3.64) | 0.56 |  |
|  |  | Well | 118 (24.1%) | 617 (24.2%) | 0.93 (0.74 - 1.16) | 0.50 |  |
|  | **Metal pipes in house – 5y prior to endpoint** | No metal pipes | 220 (44.9%) | 1115 (43.7%) | 1 (1 - 1) |  | <0.001 |
|  |  | Metal pipes | 258 (52.7%) | 1238 (48.5%) | 1.06 (0.87 - 1.29) | 0.59 |  |
|  |  | Not recorded | 12 (2.4%) | 201 (7.9%) | 0.3 (0.17 - 0.55) | <0.001 |  |
|  | **Plastic pipes in house – 5y prior to endpoint** | No plastic pipes | 240 (49%) | 1159 (45.4%) | 1 (1 - 1) |  | <0.001 |
|  |  | Plastic pipes | 238 (48.6%) | 1194 (46.8%) | 0.96 (0.79 - 1.17) | 0.70 |  |
|  |  | Not recorded | 12 (2.4%) | 201 (7.9%) | 0.29 (0.16 - 0.52) | <0.001 |  |
|  | **Mode primary heating fuel -5y prior endpoint** | Electric | 127 (25.9%) | 572 (22.4%) | 1 (1 - 1) |  | <0.001 |
|  |  | Natural gas | 274 (55.9%) | 1303 (51%) | 0.95 (0.75 - 1.19) | 0.64 |  |
|  |  | Not recorded | 13 (2.7%) | 206 (8.1%) | 0.28 (0.16 - 0.51) | <0.001 |  |
|  |  | Oil | 25 (5.1%) | 221 (8.7%) | 0.51 (0.32 - 0.8) | <0.01 |  |
|  |  | Other | 2 (0.4%) | 18 (0.7%) | 0.5 (0.11 - 2.18) | 0.36 |  |
|  |  | Propane | 34 (6.9%) | 176 (6.9%) | 0.87 (0.57 - 1.32) | 0.51 |  |
|  |  | Renewable | 3 (0.6%) | 17 (0.7%) | 0.79 (0.23 - 2.75) | 0.72 |  |
|  |  | Wood | 12 (2.4%) | 41 (1.6%) | 1.32 (0.67 - 2.58) | 0.42 |  |
|  | **Mode primary cooking fuel – 5y prior to endpoint** | Electric | 236 (48.2%) | 1274 (49.9%) | 1 (1 - 1) |  | <0.001 |
|  |  | Natural gas | 197 (40.2%) | 878 (34.4%) | 1.21 (0.98 - 1.49) | 0.07 |  |
|  |  | Not recorded | 12 (2.4%) | 203 (7.9%) | 0.32 (0.18 - 0.58) | <0.001 |  |
|  |  | Propane | 45 (9.2%) | 199 (7.8%) | 1.22 (0.86 - 1.74) | 0.27 |  |
|  | Mode secondary heating fuel – 5y prior to endpoint | Electric | 72 (14.7%) | 375 (14.7%) | 1 (1 - 1) |  | 0.20 |
|  |  | Natural gas | 23 (4.7%) | 133 (5.2%) | 0.9 (0.54 - 1.5) | 0.69 |  |
|  |  | Not recorded | 259 (52.9%) | 1429 (56%) | 0.94 (0.71 - 1.25) | 0.69 |  |
|  |  | Oil | 6 (1.2%) | 23 (0.9%) | 1.36 (0.53 - 3.45) | 0.51 |  |
|  |  | Other | 87 (17.8%) | 329 (12.9%) | 1.38 (0.97 - 1.95) | 0.07 |  |
|  |  | Propane | 13 (2.7%) | 68 (2.7%) | 1 (0.52 - 1.9) | 0.99 |  |
|  |  | Renewable | 0 (0%) | 1 (0%) | 0 (0 - Inf) | 0.97 |  |
|  |  | Wood | 30 (6.1%) | 196 (7.7%) | 0.8 (0.5 - 1.26) | 0.33 |  |
|  | **Mode secondary cooking fuel – 5y prior to endpoint** | Electric | 130 (26.5%) | 576 (22.6%) | 1 (1 - 1) |  | <0.001 |
|  |  | Natural gas | 11 (2.2%) | 62 (2.4%) | 0.79 (0.4 - 1.53) | 0.48 |  |
|  |  | Not recorded | 223 (45.5%) | 1430 (56%) | 0.69 (0.55 - 0.88) | <0.01 |  |
|  |  | Other | 98 (20%) | 360 (14.1%) | 1.21 (0.9 - 1.62) | 0.21 |  |
|  |  | Propane | 28 (5.7%) | 126 (4.9%) | 0.98 (0.63 - 1.55) | 0.94 |  |
|  | **Mode US region – 5y prior to endpoint** | Midwest | 61 (12.4%) | 317 (12.4%) | 1 (1 - 1) |  | 0.01 |
|  |  | Northeast | 60 (12.2%) | 256 (10%) | 1.22 (0.82 - 1.8) | 0.32 |  |
|  |  | Not recorded | 179 (36.5%) | 1142 (44.7%) | 0.81 (0.59 - 1.12) | 0.20 |  |
|  |  | South | 104 (21.2%) | 438 (17.1%) | 1.23 (0.87 - 1.75) | 0.23 |  |
|  |  | West | 86 (17.6%) | 401 (15.7%) | 1.11 (0.78 - 1.6) | 0.55 |  |
|  | Used aerosol-early life | Not within early life | 230 (46.9%) | 1122 (43.9%) | 1 (1 - 1) |  | 0.22 |
|  |  | Within early life | 260 (53.1%) | 1432 (56.1%) | 0.89 (0.73 - 1.08) | 0.22 |  |
|  | Used air cleaner – early life | Not within early life | 410 (83.7%) | 2082 (81.5%) | 1 (1 - 1) |  | 0.25 |
|  |  | Within early life | 80 (16.3%) | 472 (18.5%) | 0.86 (0.66 - 1.12) | 0.25 |  |
|  | Used HEPA filter- early life | Not within early life | 279 (56.9%) | 1459 (57.1%) | 1 (1 - 1) |  | 0.94 |
|  |  | Within early life | 211 (43.1%) | 1095 (42.9%) | 1.01 (0.83 - 1.22) | 0.94 |  |
|  | Used moth balls – early life | Not within early life | 476 (97.1%) | 2484 (97.3%) | 1 (1 - 1) |  | 0.89 |
|  |  | Within early life | 14 (2.9%) | 70 (2.7%) | 1.04 (0.58 - 1.87) | 0.89 |  |
|  | Used incense/candles – early life | Not within early life | 199 (40.6%) | 983 (38.5%) | 1 (1 - 1) |  | 0.38 |
|  |  | Within early life | 291 (59.4%) | 1571 (61.5%) | 0.92 (0.75 - 1.11) | 0.37 |  |
|  | Exposed to smoke -early life | Not within early life | 451 (92%) | 2282 (89.4%) | 1 (1 - 1) |  | 0.06 |
|  |  | Within early life | 39 (8%) | 272 (10.6%) | 0.73 (0.51 - 1.03) | 0.07 |  |
|  | **Used aerosol – rest of life** | Not within rest of life | 242 (49.4%) | 1414 (55.4%) | 1 (1 - 1) |  | 0.01 |
|  |  | Within rest of life | 248 (50.6%) | 1140 (44.6%) | 1.27 (1.05 - 1.54) | 0.01 |  |
|  | Used air cleaner – rest of life | Not within rest of life | 358 (73.1%) | 1925 (75.4%) | 1 (1 - 1) |  | 0.28 |
|  |  | Within rest of life | 132 (26.9%) | 629 (24.6%) | 1.13 (0.91 - 1.4) | 0.28 |  |
|  | **Used HEPA filter – rest of life** | Not within rest of life | 234 (47.8%) | 1342 (52.5%) | 1 (1 - 1) |  | 0.05 |
|  |  | Within rest of life | 256 (52.2%) | 1212 (47.5%) | 1.21 (1 - 1.47) | 0.05 |  |
|  | Used moth balls – rest of life | Not within rest of life | 484 (98.8%) | 2512 (98.4%) | 1 (1 - 1) |  | 0.48 |
|  |  | Within rest of life | 6 (1.2%) | 42 (1.6%) | 0.74 (0.31 - 1.75) | 0.50 |  |
|  | **Used incense/candles – rest of life** | Not within rest of life | 221 (45.1%) | 1275 (49.9%) | 1 (1 - 1) |  | 0.05 |
|  |  | Within rest of life | 269 (54.9%) | 1279 (50.1%) | 1.21 (1 - 1.47) | 0.05 |  |
|  | Exposed to smoke – rest of life | Not within rest of life | 434 (88.6%) | 2275 (89.1%) | 1 (1 - 1) |  | 0.74 |
|  |  | Within rest of life | 56 (11.4%) | 279 (10.9%) | 1.05 (0.78 - 1.43) | 0.74 |  |
|  | **Any weed treatment – rest of life** | Not within rest of life | 159 (32.4%) | 1133 (44.4%) | 1 (1 - 1) |  | <0.001 |
|  |  | Within rest of life | 331 (67.6%) | 1421 (55.6%) | 1.66 (1.35 - 2.04) | <0.001 |  |
|  | **Any insect treatment – rest of life** | Not within rest of life | 185 (37.8%) | 1215 (47.6%) | 1 (1 - 1) |  | <0.001 |
|  |  | Within rest of life | 305 (62.2%) | 1339 (52.4%) | 1.5 (1.23 - 1.82) | <0.001 |  |
|  | **Any fertilizer treatment – rest of life** | Not within rest of life | 134 (27.3%) | 1022 (40%) | 1 (1 - 1) |  | <0.001 |
|  |  | Within rest of life | 356 (72.7%) | 1532 (60%) | 1.77 (1.43 - 2.19) | <0.001 |  |
|  | Used aerosol – whole life | Not within whole life | 185 (37.8%) | 930 (36.4%) | 1 (1 - 1) |  | 0.57 |
|  |  | Within whole life | 305 (62.2%) | 1624 (63.6%) | 0.94 (0.77 - 1.15) | 0.57 |  |
|  | Used air cleaner – whole life | Not within whole life | 336 (68.6%) | 1722 (67.4%) | 1 (1 - 1) |  | 0.62 |
|  |  | Within whole life | 154 (31.4%) | 832 (32.6%) | 0.95 (0.77 - 1.17) | 0.62 |  |
|  | Used HEPA filter – whole life | Not within whole life | 190 (38.8%) | 1029 (40.3%) | 1 (1 - 1) |  | 0.53 |
|  |  | Within whole life | 300 (61.2%) | 1525 (59.7%) | 1.07 (0.87 - 1.3) | 0.53 |  |
|  | Used moth balls – whole life | Not within whole life | 476 (97.1%) | 2468 (96.6%) | 1 (1 - 1) |  | 0.55 |
|  |  | Within whole life | 14 (2.9%) | 86 (3.4%) | 0.84 (0.48 - 1.5) | 0.56 |  |
|  | Used incense/candles – whole life | Not within whole life | 165 (33.7%) | 785 (30.7%) | 1 (1 - 1) |  | 0.20 |
|  |  | Within whole life | 325 (66.3%) | 1769 (69.3%) | 0.87 (0.71 - 1.07) | 0.20 |  |
|  | Exposed to smoke – whole life | Not within whole life | 420 (85.7%) | 2151 (84.2%) | 1 (1 - 1) |  | 0.40 |
|  |  | Within whole life | 70 (14.3%) | 403 (15.8%) | 0.89 (0.68 - 1.17) | 0.40 |  |
|  | **Any weed treatment – whole life** | Not within whole life | 159 (32.4%) | 1133 (44.4%) | 1 (1 - 1) |  | <0.001 |
|  |  | Within whole life | 331 (67.6%) | 1421 (55.6%) | 1.66 (1.35 - 2.04) | <0.001 |  |
|  | **Any insect treatment – whole life** | Not within whole life | 162 (33.1%) | 1059 (41.5%) | 1 (1 - 1) |  | <0.001 |
|  |  | Within whole life | 328 (66.9%) | 1495 (58.5%) | 1.43 (1.17 - 1.76) | <0.001 |  |
|  | **Any fertilizer treatment – whole life** | Not within whole life | 134 (27.3%) | 1022 (40%) | 1 (1 - 1) |  | <0.001 |
|  |  | Within whole life | 356 (72.7%) | 1532 (60%) | 1.77 (1.43 - 2.19) | <0.001 |  |
|  | Hours of smoke exposure – early life (terciles) | >=2-<7h | 16 (3.3%) | 112 (4.4%) | 1 (1 - 1) |  | 0.25 |
|  |  | >=7-72h | 15 (3.1%) | 90 (3.5%) | 1.17 (0.55 - 2.49) | 0.70 |  |
|  |  | >0-<2h | 8 (1.6%) | 70 (2.7%) | 0.8 (0.33 - 1.97) | 0.62 |  |
|  |  | No smoke exposure | 451 (92%) | 2282 (89.4%) | 1.38 (0.81 - 2.36) | 0.23 |  |
|  | Hours of smoke exposure – rest of life (terciles) | >=2-<9h | 19 (3.9%) | 95 (3.7%) | 1 (1 - 1) |  | 0.85 |
|  |  | >=9-378h | 17 (3.5%) | 96 (3.8%) | 0.89 (0.43 - 1.81) | 0.74 |  |
|  |  | >0-<2h | 20 (4.1%) | 85 (3.3%) | 1.18 (0.59 - 2.35) | 0.64 |  |
|  |  | No smoke exposure | 434 (88.6%) | 2278 (89.2%) | 0.95 (0.58 - 1.58) | 0.8 |  |
|  | **Hours of smoke exposure – whole life (terciles)** | >=10-388h | 28 (5.7%) | 132 (5.2%) | 1 (1 - 1) |  | 0.17 |
|  |  | >=2-<10h | 19 (3.9%) | 160 (6.3%) | 0.56 (0.3 - 1.05) | 0.07 |  |
|  |  | >0-<2h | 23 (4.7%) | 108 (4.2%) | 1 (0.55 - 1.84) | 0.99 |  |
|  |  | No smoke exposure | 420 (85.7%) | 2154 (84.3%) | 0.92 (0.6 - 1.4) | 0.69 |  |
|  | **Sleep in the garage – early life** | Not within early life | 484 (98.8%) | 2485 (97.3%) | 1 (1 - 1) |  | 0.09 |
|  |  | Not recorded | 0 (0%) | 2 (0.1%) | 0 (0 - Inf) | 0.96 |  |
|  |  | Within early life | 6 (1.2%) | 67 (2.6%) | 0.46 (0.2 - 1.07) | 0.07 |  |
|  | Sleep in the house – early life | Not within early life | 4 (0.8%) | 37 (1.4%) | 1 (1 - 1) |  | 0.35 |
|  |  | Not recorded | 0 (0%) | 2 (0.1%) | 0 (0 - Inf) | 0.96 |  |
|  |  | Within early life | 486 (99.2%) | 2515 (98.5%) | 1.79 (0.63 - 5.04) | 0.27 |  |
|  | **Sleep outside – early life** | Not within early life | 472 (96.3%) | 2397 (93.9%) | 1 (1 - 1) |  | 0.02 |
|  |  | Within early life | 18 (3.7%) | 157 (6.1%) | 0.58 (0.35 - 0.96) | 0.03 |  |
|  | Sleep in the garage – rest of life | Not within rest of life | 479 (97.8%) | 2490 (97.5%) | 1 (1 - 1) |  | 0.80 |
|  |  | Not recorded | 0 (0%) | 1 (0%) | 0 (0 - Inf) | 0.97 |  |
|  |  | Within rest of life | 11 (2.2%) | 63 (2.5%) | 0.91 (0.47 - 1.74) | 0.76 |  |
|  | **Sleep in the house – rest of life** | Not within rest of life | 11 (2.2%) | 438 (17.1%) | 1 (1 - 1) |  | <0.001 |
|  |  | Within rest of life | 479 (97.8%) | 2116 (82.9%) | 9.01 (4.91 - 16.53) | <0.001 |  |
|  | **Sleep outside – rest of life** | Not within rest of life | 473 (96.5%) | 2418 (94.7%) | 1 (1 - 1) |  | 0.17 |
|  |  | Not recorded | 0 (0%) | 1 (0%) | 0 (0 - Inf) | 0.97 |  |
|  |  | Within rest of life | 17 (3.5%) | 135 (5.3%) | 0.64 (0.38 - 1.08) | 0.09 |  |
|  | **Sleep in the garage – whole life** | Not within whole life | 479 (97.8%) | 2454 (96.1%) | 1 (1 - 1) |  | 0.12 |
|  |  | Not recorded | 0 (0%) | 3 (0.1%) | 0 (0 - Inf) | 0.96 |  |
|  |  | Within whole life | 11 (2.2%) | 97 (3.8%) | 0.58 (0.31 - 1.09) | 0.09 |  |
|  | Sleep in the house- whole life | Not within whole life | 2 (0.4%) | 23 (0.9%) | 1 (1 - 1) |  | 0.34 |
|  |  | Not recorded | 0 (0%) | 2 (0.1%) | 0 (0 - Inf) | 0.96 |  |
|  |  | Within whole life | 488 (99.6%) | 2529 (99%) | 2.22 (0.52 - 9.44) | 0.28 |  |
|  | **Sleep outside- whole life** | Not within whole life | 466 (95.1%) | 2343 (91.7%) | 1 (1 - 1) |  | 0.02 |
|  |  | Not recorded | 0 (0%) | 1 (0%) | 0 (0 - Inf) | 0.97 |  |
|  |  | Within whole life | 24 (4.9%) | 210 (8.2%) | 0.57 (0.37 - 0.89) | 0.01 |  |
|  | **Main sleep location- whole life** | Garage | 3 (0.6%) | 20 (0.8%) | 1 (1 - 1) |  | 0.10 |
|  |  | House | 485 (99%) | 2498 (97.8%) | 1.29 (0.38 - 4.37) | 0.68 |  |
|  |  | Outside | 2 (0.4%) | 36 (1.4%) | 0.37 (0.06 - 2.41) | 0.30 |  |
|  | **Mode sleep location – 5y prior to endpoint** | Garage | 5 (1%) | 27 (1.1%) | 1 (1 - 1) |  | <0.001 |
|  |  | House | 472 (96.3%) | 2301 (90.1%) | 1.11 (0.42 - 2.89) | 0.83 |  |
|  |  | Not recorded | 12 (2.4%) | 201 (7.9%) | 0.32 (0.11 - 0.99) | 0.04 |  |
|  |  | Outside | 1 (0.2%) | 25 (1%) | 0.22 (0.02 - 1.98) | 0.17 |  |
|  | Used aerosol-5y prior to endpoint | No | 243 (49.6%) | 1288 (50.4%) | 1 (1 - 1) |  | 0.73 |
|  |  | Yes | 247 (50.4%) | 1266 (49.6%) | 1.03 (0.85 - 1.25) | 0.73 |  |
|  | Used air cleaner- 5y prior to endpoint | No | 373 (76.1%) | 1916 (75%) | 1 (1 - 1) |  | 0.60 |
|  |  | Yes | 117 (23.9%) | 638 (25%) | 0.94 (0.75 - 1.18) | 0.60 |  |
|  | **Used HEPA filter - 5y prior to endpoint** | No | 235 (48%) | 1322 (51.8%) | 1 (1 - 1) |  | 0.12 |
|  |  | Yes | 255 (52%) | 1232 (48.2%) | 1.16 (0.96 - 1.41) | 0.12 |  |
|  | Used moth balls- 5y prior to endpoint | No | 484 (98.8%) | 2506 (98.1%) | 1 (1 - 1) |  | 0.29 |
|  |  | Yes | 6 (1.2%) | 48 (1.9%) | 0.65 (0.28 - 1.52) | 0.31 |  |
|  | Used incense or candles- 5y prior to endpoint | No | 229 (46.7%) | 1157 (45.3%) | 1 (1 - 1) |  | 0.56 |
|  |  | Yes | 261 (53.3%) | 1397 (54.7%) | 0.94 (0.78 - 1.15) | 0.56 |  |
|  | Exposed to smoke- 5y prior to endpoint | No | 436 (89%) | 2263 (88.6%) | 1 (1 - 1) |  | 0.81 |
|  |  | Yes | 54 (11%) | 291 (11.4%) | 0.96 (0.71 - 1.31) | 0.81 |  |
|  | **Any weed treatment -5y prior to endpoint** | No | 189 (38.6%) | 1242 (48.6%) | 1 (1 - 1) |  | <0.001 |
|  |  | Yes | 301 (61.4%) | 1312 (51.4%) | 1.51 (1.24 - 1.84) | <0.001 |  |
|  | **Any insect treatment -5y prior to endpoint** | No | 212 (43.3%) | 1252 (49%) | 1 (1 - 1) |  | 0.02 |
|  |  | Yes | 278 (56.7%) | 1302 (51%) | 1.26 (1.04 - 1.53) | 0.02 |  |
|  | **Any fertilizer treatment -5y prior to endpoint** | No | 163 (33.3%) | 1148 (44.9%) | 1 (1 - 1) |  | <0.001 |
|  |  | Yes | 327 (66.7%) | 1406 (55.1%) | 1.64 (1.34 - 2.01) | <0.001 |  |
|  | Hours of smoke exposure-5y prior to endpoint (terciles) | >=14-368h | 20 (4.1%) | 100 (3.9%) | 1 (1 - 1) |  | 0.94 |
|  |  | >=4-<14h | 18 (3.7%) | 91 (3.6%) | 0.99 (0.49 - 1.99) | 0.97 |  |
|  |  | >0-<4h | 16 (3.3%) | 97 (3.8%) | 0.82 (0.4 - 1.68) | 0.59 |  |
|  |  | no_smoke | 436 (89%) | 2266 (88.7%) | 0.96 (0.59 - 1.57) | 0.88 |  |
| Comorbidities | **Number of comorbidities present – whole life** | 0 | 469 (95.7%) | 2467 (96.6%) | 1 (1 - 1) |  | 0.02 |
|  |  | 1 | 21 (4.3%) | 68 (2.7%) | 1.62 (0.99 - 2.68) | 0.06 |  |
|  |  | 2 | 0 (0%) | 13 (0.5%) | 0 (0 - Inf) | 0.97 |  |
|  |  | 3 | 0 (0%) | 6 (0.2%) | 0 (0 - Inf) | 0.98 |  |
|  | **Chronic inflammatory condition present – whole life** | No chronic inflammatory condition present | 461 (94.1%) | 2454 (96.1%) | 1 (1 - 1) |  | 0.05 |
|  |  | Chronic inflammatory condition present | 29 (5.9%) | 100 (3.9%) | 1.54 (1.01 - 2.36) | 0.04 |  |
|  | Chronic inflammatory condition present – 5y prior to endpoint | No chronic inflammatory condition present | 476 (97.1%) | 2493 (97.6%) | 1 (1 - 1) |  | 0.55 |
|  |  | Chronic inflammatory condition present | 14 (2.9%) | 61 (2.4%) | 1.2 (0.67 - 2.17) | 0.54 |  |
|  | **Number comorbidities present – 5y prior to endpoint** | 0 | 476 (97.1%) | 2493 (97.6%) | 1 (1 - 1) |  | 0.05 |
|  |  | 1 | 14 (2.9%) | 45 (1.8%) | 1.63 (0.89 - 2.99) | 0.11 |  |
|  |  | 2 | 0 (0%) | 11 (0.4%) | 0 (0 - Inf) | 0.96 |  |
|  |  | 3 | 0 (0%) | 5 (0.2%) | 0 (0 - Inf) | 0.97 |  |
|  | Intestinal parasitism - 5y prior to endpoint | Not present | 486 (99.2%) | 2540 (99.5%) | 1 (1 - 1) |  | 0.50 |
|  |  | Present | 4 (0.8%) | 14 (0.5%) | 1.49 (0.49 - 4.55) | 0.48 |  |
|  | Tick borne parasitism -5y prior to endpoint | Not present | 481 (98.2%) | 2522 (98.7%) | 1 (1 - 1) |  | 0.32 |
|  |  | Present | 9 (1.8%) | 32 (1.3%) | 1.47 (0.7 - 3.11) | 0.31 |  |
|  | Other parasitism-5y prior to endpoint | Not present | 488 (99.6%) | 2551 (99.9%) | 1 (1 - 1) |  | 0.20 |
|  |  | Present | 2 (0.4%) | 3 (0.1%) | 3.48 (0.58 - 20.91) | 0.17 |  |
|  | **All parasitism-5y prior to endpoint** | Not present | 475 (96.9%) | 2507 (98.2%) | 1 (1 - 1) |  | 0.10 |
|  |  | Present | 15 (3.1%) | 47 (1.8%) | 1.68 (0.93 - 3.04) | 0.08 |  |
|  | Infectious -5y prior to endpoint | Not present | 490 (100%) | 2553 (100%) | 1 (1 - 1) |  | 0.55 |
|  |  | Present | 0 (0%) | 1 (0%) | 0 (0 - Inf) | 0.97 |  |
|  | Immune mediated -5y prior to endpoint | Not present | 478 (97.6%) | 2476 (96.9%) | 1 (1 - 1) |  | 0.45 |
|  |  | Present | 12 (2.4%) | 78 (3.1%) | 0.8 (0.43 - 1.47) | 0.50 |  |
|  | **Cardiovascular-5y prior to endpoint** | Not present | 477 (97.3%) | 2510 (98.3%) | 1 (1 - 1) |  | 0.18 |
|  |  | Present | 13 (2.7%) | 44 (1.7%) | 1.55 (0.83 - 2.91) | 0.17 |  |
|  | **Gastrointestinal-5y prior to endpoint** | Not present | 442 (90.2%) | 2416 (94.6%) | 1 (1 - 1) |  | <0.001 |
|  |  | Present | 48 (9.8%) | 138 (5.4%) | 1.9 (1.35 - 2.68) | <0.001 |  |
|  | **Other inflammatory condition-5y prior to endpoint** | Not present | 386 (78.8%) | 2093 (81.9%) | 1 (1 - 1) |  | 0.10 |
|  |  | Present | 104 (21.2%) | 461 (18.1%) | 1.22 (0.96 - 1.55) | 0.10 |  |
|  | Orthopaedic-5y prior to endpoint | Not present | 432 (88.2%) | 2290 (89.7%) | 1 (1 - 1) |  | 0.33 |
|  |  | Present | 58 (11.8%) | 264 (10.3%) | 1.16 (0.86 - 1.58) | 0.32 |  |
|  | **Chronic inflammatory condition-5y prior to endpoint** | Not present | 420 (85.7%) | 2270 (88.9%) | 1 (1 - 1) |  | 0.05 |
|  |  | Present | 70 (14.3%) | 284 (11.1%) | 1.33 (1.01 - 1.77) | 0.05 |  |
|  | Orthopaedic comorbidity- whole life | Not present | 432 (88.2%) | 2256 (88.3%) | 1 (1 - 1) |  | 0.92 |
|  |  | Present | 58 (11.8%) | 298 (11.7%) | 1.02 (0.75 - 1.37) | 0.92 |  |
|  | Immune mediated comorbidity- whole life | Not present | 463 (94.5%) | 2409 (94.3%) | 1 (1 - 1) |  | 0.88 |
|  |  | Present | 27 (5.5%) | 145 (5.7%) | 0.97 (0.63 - 1.48) | 0.88 |  |
|  | Cardiovascular comorbidity- whole life | Not present | 481 (98.2%) | 2515 (98.5%) | 1 (1 - 1) |  | 0.62 |
|  |  | Present | 9 (1.8%) | 39 (1.5%) | 1.21 (0.58 - 2.51) | 0.61 |  |
|  | **Gastrointestinal comorbidity- whole life** | Not present | 476 (97.1%) | 2518 (98.6%) | 1 (1 - 1) |  | 0.03 |
|  |  | Present | 14 (2.9%) | 36 (1.4%) | 2.06 (1.1 - 3.84) | 0.02 |  |
|  | **Inflammatory other comorbidity- whole life** | Not present | 474 (96.7%) | 2504 (98%) | 1 (1 - 1) |  | 0.08 |
|  |  | Present | 16 (3.3%) | 50 (2%) | 1.69 (0.95 - 2.99) | 0.07 |  |
|  | **Chronic inflammatory comorbidity- whole life** | Not present | 407 (83.1%) | 2198 (86.1%) | 1 (1 - 1) |  | 0.09 |
|  |  | Present | 83 (16.9%) | 356 (13.9%) | 1.26 (0.97 - 1.64) | 0.09 |  |
|  | Benign cancers count -- 5y prior to endpoint | 0 | 472 (96.3%) | 2443 (95.7%) | 1 (1 - 1) |  | 0.43 |
|  |  | 1 | 18 (3.7%) | 107 (4.2%) | 0.87 (0.52 - 1.45) | 0.59 |  |
|  |  | 2 | 0 (0%) | 4 (0.2%) | 0 (0 - Inf) | 0.96 |  |
|  | **Benign cancer present-- 5y prior to endpoint** | Not present | 489 (99.8%) | 2525 (98.9%) | 1 (1 - 1) |  | 0.02 |
|  |  | Present | 1 (0.2%) | 29 (1.1%) | 0.18 (0.02 - 1.31) | 0.09 |  |
|  | **Any cancers count -- 5y prior to endpoint (haemangiosarcoma excluded)** | 0 | 413 (84.3%) | 1840 (72%) | 1 (1 - 1) |  | <0.001 |
|  |  | 1 | 75 (15.3%) | 712 (27.9%) | 0.47 (0.36 - 0.61) | <0.001 |  |
|  |  | 2 | 2 (0.4%) | 2 (0.1%) | 4.46 (0.63 - 31.72) | 0.13 |  |
|  | **Malignant cancers count -- 5y prior to endpoint (haemangiosarcoma excluded)** | 0 | 417 (85.1%) | 1943 (76.1%) | 1 (1 - 1) |  | <0.001 |
|  |  | 1 | 71 (14.5%) | 608 (23.8%) | 0.54 (0.42 - 0.71) | <0.001 |  |
|  |  | 2 | 2 (0.4%) | 3 (0.1%) | 3.11 (0.52 - 18.65) | 0.21 |  |
|  | **Malignant cancer present -- 5y prior to endpoint (haemangiosarcoma excluded)** | Not present | 417 (85.1%) | 1943 (76.1%) | 1 (1 - 1) |  | <0.001 |
|  |  | Present | 73 (14.9%) | 611 (23.9%) | 0.56 (0.43 - 0.73) | <0.001 |  |
|  | **Any other cancer present -- 5y prior to endpoint (haemangiosarcoma excluded)** | Not present | 413 (84.3%) | 1840 (72%) | 1 (1 - 1) |  | <0.001 |
|  |  | Present | 77 (15.7%) | 714 (28%) | 0.48 (0.37 - 0.62) | <0.001 |  |
| Medication | **Antimicrobial use – whole life (halves)** | 1-4 times | 225 (45.9%) | 1098 (43%) | 1 (1 - 1) |  | <0.001 |
|  |  | >4-37 times | 192 (39.2%) | 860 (33.7%) | 1.09 (0.88 - 1.35) | 0.43 |  |
|  |  | No medication records for this time period | 73 (14.9%) | 596 (23.3%) | 0.6 (0.45 - 0.79) | <0.001 |  |
|  | **Dietary supplements– whole life (halves)** | 1-2 times | 115 (23.5%) | 544 (21.3%) | 1 (1 - 1) |  | 0.01 |
|  |  | >2-50 times | 79 (16.1%) | 304 (11.9%) | 1.23 (0.89 - 1.69) | 0.20 |  |
|  |  | No medication records for this time period | 296 (60.4%) | 1706 (66.8%) | 0.82 (0.65 - 1.04) | 0.10 |  |
|  | **Enteric medications – whole life (halves)** | 1 times | 89 (18.2%) | 330 (12.9%) | 1 (1 - 1) |  | 0.01 |
|  |  | >1-18 times | 66 (13.5%) | 344 (13.5%) | 0.71 (0.5 - 1.01) | 0.058 |  |
|  |  | No medication records for this time period | 335 (68.4%) | 1880 (73.6%) | 0.66 (0.51 - 0.86) | <0.01 |  |
|  | Fluid metabolites – whole life (halves) | 1 times | 9 (1.8%) | 37 (1.4%) | 1 (1 - 1) |  | 0.45 |
|  |  | >1-4 times | 3 (0.6%) | 7 (0.3%) | 1.76 (0.38 - 8.19) | 0.47 |  |
|  |  | No medication records for this time period | 478 (97.6%) | 2510 (98.3%) | 0.78 (0.38 - 1.63) | 0.51 |  |
|  | Hormones and related – whole life (halves) | 1-2 times | 25 (5.1%) | 120 (4.7%) | 1 (1 - 1) |  | 0.68 |
|  |  | >2-11 times | 21 (4.3%) | 91 (3.6%) | 1.11 (0.58 - 2.1) | 0.75 |  |
|  |  | No medication records for this time period | 444 (90.6%) | 2343 (91.7%) | 0.91 (0.58 - 1.42) | 0.67 |  |
|  | **Immunological– whole life (halves)** | 1-2 times | 94 (19.2%) | 401 (15.7%) | 1 (1 - 1) |  | <0.01 |
|  |  | >2-19 times | 65 (13.3%) | 233 (9.1%) | 1.19 (0.83 - 1.7) | 0.34 |  |
|  |  | No medication records for this time period | 331 (67.6%) | 1920 (75.2%) | 0.74 (0.57 - 0.95) | 0.02 |  |
|  | **Miscellaneous drugs – whole life (halves)** | 1 times | 80 (16.3%) | 344 (13.5%) | 1 (1 - 1) |  | 0.05 |
|  |  | >1-16 times | 63 (12.9%) | 268 (10.5%) | 1.01 (0.7 - 1.46) | 0.95 |  |
|  |  | No medication records for this time period | 347 (70.8%) | 1942 (76%) | 0.77 (0.59 - 1.01) | 0.05 |  |
|  | Neurological drugs – whole life (halves) | 1-2 times | 125 (25.5%) | 622 (24.4%) | 1 (1 - 1) |  | 0.31 |
|  |  | >2-27 times | 78 (15.9%) | 351 (13.7%) | 1.11 (0.81 - 1.51) | 0.53 |  |
|  |  | No medication records for this time period | 287 (58.6%) | 1581 (61.9%) | 0.9 (0.72 - 1.14) | 0.38 |  |
|  | **Anti-parasites – whole life (halves)** | 1-6 times | 217 (44.3%) | 1249 (48.9%) | 1 (1 - 1) |  | <0.001 |
|  |  | >6-30 times | 232 (47.3%) | 930 (36.4%) | 1.44 (1.17 - 1.76) | <0.001 |  |
|  |  | No medication records for this time period | 41 (8.4%) | 375 (14.7%) | 0.63 (0.44 - 0.9) | 0.01 |  |
|  | Anti-septics – whole life (halves) | 1 times | 19 (3.9%) | 126 (4.9%) | 1 (1 - 1) |  | 0.57 |
|  |  | >1-9 times | 8 (1.6%) | 45 (1.8%) | 1.18 (0.48 - 2.88) | 0.71 |  |
|  |  | No medication records for this time period | 463 (94.5%) | 2383 (93.3%) | 1.29 (0.79 - 2.11) | 0.31 |  |
|  | Cardio-respiratory drugs – whole life (halves) | 1 times | 24 (4.9%) | 96 (3.8%) | 1 (1 - 1) |  | 0.38 |
|  |  | >1-24 times | 8 (1.6%) | 56 (2.2%) | 0.57 (0.24 - 1.36) | 0.205 |  |
|  |  | No medication records for this time period | 458 (93.5%) | 2402 (94%) | 0.76 (0.48 - 1.21) | 0.25 |  |
|  | Diuretics – whole life (halves) | 1 times | 2 (0.4%) | 16 (0.6%) | 1 (1 - 1) |  | 0.69 |
|  |  | >1-2 times | 0 (0%) | 1 (0%) | 0 (0 - Inf) | 0.974 |  |
|  |  | No medication records for this time period | 488 (99.6%) | 2537 (99.3%) | 1.54 (0.35 - 6.71) | 0.56 |  |
|  | Anti-histamines – whole life (halves) | 1 times | 10 (2%) | 43 (1.7%) | 1 (1 - 1) |  | 0.50 |
|  |  | >1-7 times | 7 (1.4%) | 23 (0.9%) | 1.31 (0.44 - 3.89) | 0.63 |  |
|  |  | No medication records for this time period | 473 (96.5%) | 2488 (97.4%) | 0.82 (0.41 - 1.64) | 0.57 |  |
|  | **Anti-inflammatories – whole life (quartiles)** | 1 times | 101 (20.6%) | 501 (19.6%) | 1 (1 - 1) |  | <0.001 |
|  |  | >1-3 times | 138 (28.2%) | 608 (23.8%) | 1.13 (0.85 - 1.49) | 0.41 |  |
|  |  | >3-4 times | 46 (9.4%) | 196 (7.7%) | 1.16 (0.79 - 1.71) | 0.44 |  |
|  |  | >4-27 times | 91 (18.6%) | 414 (16.2%) | 1.09 (0.8 - 1.49) | 0.59 |  |
|  |  | No medication records for this time period | 114 (23.3%) | 835 (32.7%) | 0.68 (0.51 - 0.9) | <0.01 |  |
|  | **Anti-microbials– whole life (quartiles)** | 1-2 times | 136 (27.8%) | 671 (26.3%) | 1 (1 - 1) |  | <0.001 |
|  |  | >2-4 times | 89 (18.2%) | 427 (16.7%) | 1.03 (0.77 - 1.38) | 0.85 |  |
|  |  | >4-7 times | 98 (20%) | 405 (15.9%) | 1.19 (0.9 - 1.59) | 0.23 |  |
|  |  | >7-37 times | 94 (19.2%) | 455 (17.8%) | 1.02 (0.76 - 1.36) | 0.89 |  |
|  |  | No medication records for this time period | 73 (14.9%) | 596 (23.3%) | 0.6 (0.45 - 0.82) | <0.01 |  |
|  | **Dietary supplements – whole life (quartiles)** | 1 times | 80 (16.3%) | 358 (14%) | 1 (1 - 1) |  | 0.05 |
|  |  | >1-2 times | 35 (7.1%) | 186 (7.3%) | 0.84 (0.55 - 1.3) | 0.44 |  |
|  |  | >2-4 times | 41 (8.4%) | 156 (6.1%) | 1.18 (0.77 - 1.79) | 0.45 |  |
|  |  | >4-50 times | 38 (7.8%) | 148 (5.8%) | 1.15 (0.75 - 1.77) | 0.54 |  |
|  |  | No medication records for this time period | 296 (60.4%) | 1706 (66.8%) | 0.78 (0.59 - 1.02) | 0.068 |  |
|  | Hormones and related– whole life (quartiles) | 1 times | 15 (3.1%) | 81 (3.2%) | 1 (1 - 1) |  | 0.87 |
|  |  | >1-2 times | 10 (2%) | 39 (1.5%) | 1.38 (0.57 - 3.36) | 0.47 |  |
|  |  | >2-4 times | 10 (2%) | 42 (1.6%) | 1.29 (0.53 - 3.11) | 0.57 |  |
|  |  | >2-11 times | 11 (2.2%) | 49 (1.9%) | 1.21 (0.52 - 2.85) | 0.65 |  |
|  |  | No medication records for this time period | 444 (90.6%) | 2343 (91.7%) | 1.02 (0.58 - 1.79) | 0.93 |  |
|  | **Immunologicals – whole life (quartiles)** | 1 times | 62 (12.7%) | 289 (11.3%) | 1 (1 - 1) |  | <0.01 |
|  |  | >1-2 times | 32 (6.5%) | 112 (4.4%) | 1.33 (0.82 - 2.15) | 0.24 |  |
|  |  | >2-4 times | 37 (7.6%) | 116 (4.5%) | 1.49 (0.94 - 2.36) | 0.09 |  |
|  |  | >4-19 times | 28 (5.7%) | 117 (4.6%) | 1.12 (0.68 - 1.83) | 0.66 |  |
|  |  | No medication records for this time period | 331 (67.6%) | 1920 (75.2%) | 0.8 (0.6 - 1.08) | 0.15 |  |
|  | Neurological drugs– whole life (quartiles) | 1 times | 82 (16.7%) | 430 (16.8%) | 1 (1 - 1) |  | 0.57 |
|  |  | >1-2 times | 43 (8.8%) | 192 (7.5%) | 1.17 (0.78 - 1.76) | 0.43 |  |
|  |  | >2-3 times | 27 (5.5%) | 122 (4.8%) | 1.16 (0.72 - 1.87) | 0.54 |  |
|  |  | >3-27 times | 51 (10.4%) | 229 (9%) | 1.17 (0.8 - 1.72) | 0.43 |  |
|  |  | No medication records for this time period | 287 (58.6%) | 1581 (61.9%) | 0.95 (0.73 - 1.24) | 0.72 |  |
|  | **Anti-parasites – whole life (quartiles)** | 1-3 times | 100 (20.4%) | 680 (26.6%) | 1 (1 - 1) |  | <0.001 |
|  |  | >3-6 times | 117 (23.9%) | 569 (22.3%) | 1.4 (1.05 - 1.87) | 0.023 |  |
|  |  | >6-9 times | 116 (23.7%) | 453 (17.7%) | 1.74 (1.3 - 2.33) | <0.001 |  |
|  |  | >9-30 times | 116 (23.7%) | 477 (18.7%) | 1.65 (1.24 - 2.21) | <0.001 |  |
|  |  | No medication records for this time period | 41 (8.4%) | 375 (14.7%) | 0.74 (0.51 - 1.09) | 0.13 |  |
|  | **Anti-inflammatories – 5y prior to endpoint (halves)** | 1 times | 194 (39.6%) | 881 (34.5%) | 1 (1 - 1) |  | <0.01 |
|  |  | >1-5 times | 142 (29%) | 669 (26.2%) | 0.96 (0.76 - 1.22) | 0.76 |  |
|  |  | No medication records for this time period | 154 (31.4%) | 1004 (39.3%) | 0.7 (0.55 - 0.88) | <0.01 |  |
|  | **Anti-microbials – 5y prior to endpoint (halves)** | 2 times | 222 (45.3%) | 1038 (40.6%) | 1 (1 - 1) |  | 0.03 |
|  |  | >2-22 times | 147 (30%) | 740 (29%) | 0.93 (0.74 - 1.17) | 0.53 |  |
|  |  | No medication records for this time period | 121 (24.7%) | 776 (30.4%) | 0.73 (0.57 - 0.93) | <0.01 |  |
|  | **Enteric drugs– 5y prior to endpoint (halves)** | 1 times | 76 (15.5%) | 275 (10.8%) | 1 (1 - 1) |  | <0.01 |
|  |  | >1-18 times | 52 (10.6%) | 248 (9.7%) | 0.76 (0.51 - 1.12) | 0.17 |  |
|  |  | No medication records for this time period | 362 (73.9%) | 2031 (79.5%) | 0.64 (0.49 - 0.85) | <0.01 |  |
|  | **Immunologicals– 5y prior to endpoint (halves)** | 1-2 times | 88 (18%) | 398 (15.6%) | 1 (1 - 1) |  | <0.01 |
|  |  | >2-12 times | 62 (12.7%) | 219 (8.6%) | 1.28 (0.89 - 1.84) | 0.18 |  |
|  |  | No medication records for this time period | 340 (69.4%) | 1937 (75.8%) | 0.79 (0.61 - 1.03) | 0.08 |  |
|  | **Miscellaneous drugs– 5y prior to endpoint (halves)** | 1 times | 58 (11.8%) | 281 (11%) | 1 (1 - 1) |  | 0.06 |
|  |  | >1-14 times | 53 (10.8%) | 196 (7.7%) | 1.31 (0.87 - 1.98) | 0.20 |  |
|  |  | No medication records for this time period | 379 (77.3%) | 2077 (81.3%) | 0.88 (0.65 - 1.2) | 0.42 |  |
|  | Neurological drugs– 5y prior to endpoint (halves) | 1 times | 111 (22.7%) | 564 (22.1%) | 1 (1 - 1) |  | 0.40 |
|  |  | >1-24 times | 59 (12%) | 259 (10.1%) | 1.16 (0.82 - 1.64) | 0.41 |  |
|  |  | No medication records for this time period | 320 (65.3%) | 1731 (67.8%) | 0.94 (0.74 - 1.19) | 0.60 |  |
|  | **Anti-parasites– 5y prior to endpoint (halves)** | 1-4 times | 218 (44.5%) | 1263 (49.5%) | 1 (1 - 1) |  | <0.01 |
|  |  | >4-20 times | 187 (38.2%) | 782 (30.6%) | 1.39 (1.12 - 1.72) | <0.01 |  |
|  |  | No medication records for this time period | 85 (17.3%) | 509 (19.9%) | 0.97 (0.74 - 1.27) | 0.81 |  |
|  | **Dietary supplements– 5y prior to endpoint (halves)** | 1-2 times | 103 (21%) | 476 (18.6%) | 1 (1 - 1) |  | 0.03 |
|  |  | >2-46 times | 59 (12%) | 225 (8.8%) | 1.21 (0.85 - 1.73) | 0.29 |  |
|  |  | No medication records for this time period | 328 (66.9%) | 1853 (72.6%) | 0.82 (0.64 - 1.04) | 0.10 |  |
|  | Antiseptics– 5y prior to endpoint (halves) | 1 times | 14 (2.9%) | 94 (3.7%) | 1 (1 - 1) |  | 0.65 |
|  |  | >1-5 times | 5 (1%) | 25 (1%) | 1.34 (0.44 - 4.08) | 0.60 |  |
|  |  | No medication records for this time period | 471 (96.1%) | 2435 (95.3%) | 1.3 (0.73 - 2.3) | 0.37 |  |
|  | Hormones and related – 5y prior to endpoint (halves) | 1-2 times | 21 (4.3%) | 108 (4.2%) | 1 (1 - 1) |  | 0.67 |
|  |  | >2-11 times | 21 (4.3%) | 88 (3.4%) | 1.02 (0.63 - 1.65) | 0.92 |  |
|  |  | No medication records for this time period | 448 (91.4%) | 2358 (92.3%) | 1.26 (0.77 - 2.04) | 0.36 |  |
|  | Cardiorespiratory drugs – 5y prior to endpoint (halves) | 1 times | 17 (3.5%) | 79 (3.1%) | 1 (1 - 1) |  | 0.74 |
|  |  | >1-24 times | 6 (1.2%) | 41 (1.6%) | 0.68 (0.25 - 1.86) | 0.45 |  |
|  |  | No medication records for this time period | 467 (95.3%) | 2434 (95.3%) | 0.89 (0.52 - 1.52) | 0.67 |  |
|  | **Fluid metabolites – 5y prior to endpoint (halves)** | 1 times | 8 (1.6%) | 21 (0.8%) | 1 (1 - 1) |  | 0.16 |
|  |  | >1-4 times | 2 (0.4%) | 4 (0.2%) | 1.31 (0.2 - 8.62) | 0.78 |  |
|  |  | No medication records for this time period | 480 (98%) | 2529 (99%) | 0.5 (0.22 - 1.13) | 0.10 |  |
|  | Diuretics – 5y prior to endpoint (halves) | 1 times | 2 (0.4%) | 15 (0.6%) | 1 (1 - 1) |  | 0.73 |
|  |  | >1-2 times | 0 (0%) | 1 (0%) | 0 (0 - Inf) | 0.97 |  |
|  |  | No medication records for this time period | 488 (99.6%) | 2538 (99.4%) | 1.44 (0.33 - 6.33) | 0.63 |  |
|  | Antihistamines– 5y prior to endpoint (halves) | 1 times | 7 (1.4%) | 32 (1.3%) | 1 (1 - 1) |  | 0.75 |
|  |  | >1-5 times | 4 (0.8%) | 14 (0.5%) | 1.31 (0.33 - 5.19) | 0.70 |  |
|  |  | No medication records for this time period | 479 (97.8%) | 2508 (98.2%) | 0.87 (0.38 - 1.99) | 0.75 |  |
|  | **Anti-inflammatories- 5y prior to endpoint (quartiles)** | 1 times | 109 (22.2%) | 538 (21.1%) | 1 (1 - 1) |  | 0.01 |
|  |  | >1-2 times | 85 (17.3%) | 343 (13.4%) | 1.32 (1.01 - 1.72) | 0.20 |  |
|  |  | >2-4 times | 92 (18.8%) | 425 (16.6%) | 1.62 (1.21 - 2.16) | 0.67 |  |
|  |  | >4-22 times | 50 (10.2%) | 244 (9.6%) | 1.41 (1.06 - 1.87) | 0.95 |  |
|  |  | No medication records for this time period | 154 (31.4%) | 1004 (39.3%) | 1.34 (0.94 - 1.89) | 0.04 |  |
|  | **Anti-microbials- 5y prior to endpoint (quartiles)** | 1 times | 98 (20%) | 455 (17.8%) | 1 (1 - 1) |  | 0.13 |
|  |  | >1-3 times | 124 (25.3%) | 583 (22.8%) | 0.99 (0.74 - 1.32) | 0.93 |  |
|  |  | >3-5 times | 67 (13.7%) | 326 (12.8%) | 0.95 (0.68 - 1.34) | 0.79 |  |
|  |  | >5-33 times | 80 (16.3%) | 414 (16.2%) | 0.9 (0.65 - 1.24) | 0.51 |  |
|  |  | No medication records for this time period | 121 (24.7%) | 776 (30.4%) | 0.72 (0.54 - 0.97) | 0.03 |  |
|  | **Immunologicals- 5y prior to endpoint (quartiles)** | 1 times | 58 (11.8%) | 287 (11.2%) | 1 (1 - 1) |  | 0.01 |
|  |  | >1-2 times | 30 (6.1%) | 111 (4.3%) | 1.34 (0.82 - 2.19) | 0.24 |  |
|  |  | >2-4 times | 38 (7.8%) | 116 (4.5%) | 1.62 (1.02 - 2.57) | 0.04 |  |
|  |  | >4-12 times | 24 (4.9%) | 103 (4%) | 1.15 (0.68 - 1.95) | 0.59 |  |
|  |  | No medication records for this time period | 340 (69.4%) | 1937 (75.8%) | 0.87 (0.64 - 1.18) | 0.36 |  |
|  | Neurological drugs- 5y prior to endpoint (quartiles) | 1 times | 68 (13.9%) | 387 (15.2%) | 1 (1 - 1) |  | 0.38 |
|  |  | >1-2 times | 43 (8.8%) | 177 (6.9%) | 1.38 (0.91 - 2.11) | 0.13 |  |
|  |  | >2-3 times | 20 (4.1%) | 94 (3.7%) | 1.21 (0.7 - 2.09) | 0.49 |  |
|  |  | >3-24 times | 39 (8%) | 165 (6.5%) | 1.35 (0.87 - 2.08) | 0.18 |  |
|  |  | No medication records for this time period | 320 (65.3%) | 1731 (67.8%) | 1.05 (0.79 - 1.4) | 0.73 |  |
|  | **Anti-parasites - 5y prior to endpoint (quartiles)** | 1-2 times | 111 (22.7%) | 668 (26.2%) | 1 (1 - 1) |  | <0.001 |
|  |  | >2-4 times | 107 (21.8%) | 595 (23.3%) | 1.08 (0.81 - 1.44) | 0.59 |  |
|  |  | >4-6 times | 72 (14.7%) | 463 (18.1%) | 0.94 (0.68 - 1.29) | 0.68 |  |
|  |  | >6-20 times | 115 (23.5%) | 319 (12.5%) | 2.17 (1.62 - 2.91) | <0.001 |  |
|  |  | No medication records for this time period | 85 (17.3%) | 509 (19.9%) | 1 (0.74 - 1.36) | 0.97 |  |
|  | **Dietary supplements- 5y prior to endpoint (quartiles)** | 1 times | 67 (13.7%) | 322 (12.6%) | 1 (1 - 1) |  | 0.10 |
|  |  | >1-2 times | 36 (7.3%) | 154 (6%) | 1.12 (0.72 - 1.76) | 0.61 |  |
|  |  | >2-3 times | 21 (4.3%) | 75 (2.9%) | 1.35 (0.78 - 2.33) | 0.29 |  |
|  |  | >3-46 times | 38 (7.8%) | 150 (5.9%) | 1.22 (0.78 - 1.9) | 0.38 |  |
|  |  | No medication records for this time period | 328 (66.9%) | 1853 (72.6%) | 0.85 (0.64 - 1.13) | 0.27 |  |
|  | Hormones and related drugs- 5y prior to endpoint (quartiles) | 1 times | 13 (2.7%) | 69 (2.7%) | 1 (1 - 1) |  | 0.89 |
|  |  | >1-2 times | 8 (1.6%) | 39 (1.5%) | 1.09 (0.42 - 2.86) | 0.86 |  |
|  |  | >2-4 times | 12 (2.4%) | 45 (1.8%) | 1.42 (0.59 - 3.38) | 0.43 |  |
|  |  | >4-11 times | 9 (1.8%) | 43 (1.7%) | 1.11 (0.44 - 2.82) | 0.82 |  |
|  |  | No medication records for this time period | 448 (91.4%) | 2358 (92.3%) | 1.01 (0.55 - 1.84) | 0.97 |  |
|  | **NSAIDs used- 5y prior to endpoint** | Drug not administered | 187 (38.2%) | 1122 (43.9%) | 1 (1 - 1) |  | <0.001 |
|  |  | Drug administered | 278 (56.7%) | 1237 (48.4%) | 1.35 (1.1 - 1.65) | <0.01 |  |
|  |  | No medication records for this time period | 25 (5.1%) | 195 (7.6%) | 0.77 (0.49 - 1.2) | 0.25 |  |
|  | **NSAID use -5y prior to endpoint (quartiles** | No NSAID admin | 189 (38.6%) | 1135 (44.4%) | 1 (1 - 1) |  | <0.01 |
|  |  | 1 times | 130 (26.5%) | 603 (23.6%) | 1.29 (1.01 - 1.65) | 0.04 |  |
|  |  | >1-2 times | 81 (16.5%) | 292 (11.4%) | 1.67 (1.25 - 2.23) | <0.001 |  |
|  |  | >2-3 times | 31 (6.3%) | 168 (6.6%) | 1.11 (0.73 - 1.67) | 0.62 |  |
|  |  | >3-11 times | 34 (6.9%) | 161 (6.3%) | 1.27 (0.85 - 1.89) | 0.24 |  |
|  |  | No medication records for this time period | 25 (5.1%) | 195 (7.6%) | 0.77 (0.49 - 1.2) | 0.24 |  |
|  | **NSAIDs used- whole life** | Drug not administered | 167 (34.1%) | 999 (39.1%) | 1 (1 - 1) |  | <0.001 |
|  |  | Drug administered | 314 (64.1%) | 1409 (55.2%) | 1.33 (1.09 - 1.64) | <0.01 |  |
|  |  | No medication records for this time period | 9 (1.8%) | 146 (5.7%) | 0.37 (0.18 - 0.74) | <0.01 |  |
|  | Steroids used- 5y prior to endpoint | Drug not administered | 255 (52%) | 1318 (51.6%) | 1 (1 - 1) |  | 0.39 |
|  |  | Drug administered | 210 (42.9%) | 1041 (40.8%) | 1.04 (0.85 - 1.27) | 0.68 |  |
|  |  | No medication records for this time period | 25 (5.1%) | 195 (7.6%) | 0.66 (0.43 - 1.03) | 0.06 |  |
|  | **Steroids used – whole life** | Drug not administered | 213 (43.5%) | 1139 (44.6%) | 1 (1 - 1) |  | 0.04 |
|  |  | Drug administered | 268 (54.7%) | 1269 (49.7%) | 1.13 (0.93 - 1.38) | 0.23 |  |
|  |  | No medication records for this time period | 9 (1.8%) | 146 (5.7%) | 0.33 (0.17 - 0.66) | <0.01 |  |
|  | **Fenbendazole used – 5y prior to endpoint** | Drug not administered | 431 (88%) | 2237 (87.6%) | 1 (1 - 1) |  | 0.06 |
|  |  | Drug administered | 34 (6.9%) | 122 (4.8%) | 1.45 (0.98 - 2.14) | 0.07 |  |
|  |  | No medication records for this time period | 25 (5.1%) | 195 (7.6%) | 0.67 (0.43 - 1.02) | 0.07 |  |
|  | **Fenbendazole used -whole life** | Drug not administered | 411 (83.9%) | 2168 (84.9%) | 1 (1 - 1) |  | <0.01 |
|  |  | Drug administered | 70 (14.3%) | 240 (9.4%) | 1.54 (1.16 - 2.05) | <0.01 |  |
|  |  | No medication records for this time period | 9 (1.8%) | 146 (5.7%) | 0.33 (0.16 - 0.64) | <0.01 |  |
