# Supplementary material for: Haemangiosarcoma in the Golden Retriever Lifetime Study: frequency, risk factors and post-diagnosis survival
Source: Research Square preprint supplement (doi:10.21203/rs.3.rs-7064010/v1), 2025-07-14
Supplement: Supplementary file 2 [file 93c9da1778a8fd6dd17d9ee7.docx]

**Table A1- Data available and transformation process to generate variables for exploration of factors associated with a haemangiosarcoma diagnosis in Golden Retriever dogs in the Golden Retriever Lifetime Study cohort (n=3044).** SY = study years.

| **Variable**  **type** | **Data sources** | **Data transformation process/es** | | **Data manipulation scripts** | **Variables created** |
| --- | --- | --- | --- | --- | --- |
| **Demographics** | | | | | |
| Age | Study_endpoints.csv, dog_profile.csv | Age at diagnosis with haemangiosarcoma (cases) or at final recorded date (for non-cases 31/12/24 or date of death/unenrolment if sooner) calculated. Age then categorised into: quartiles, biologically relevant categories and categories according to a recent haemangiosarcoma study by Barry and colleagues (Dorea & Brodbelt, 2025) | | https://github.com/ctaylo-16/GRLS_analyses/blob/08f7bc1657d3fd3228b67d7a60868dc06275438e/Code/Creating%20HSA%20study%20population.qmd | Age at final date (Barry), age at final date biological, age at final date quartiles |
| Sex and neutering | dog_profile.csv, | Age at neutering calculated if neutering date provided and birth date | | https://github.com/ctaylo-16/GRLS_analyses/blob/08f7bc1657d3fd3228b67d7a60868dc06275438e/Code/GRLS%20repro.qmd | Sex, neuter, Sex neuter, Age at neutering |
| Reproduction | reproductive_history_female.csv, reproductive_history_heat.csv, reproductive_history_male.csv, details_spay_before_heat.csv | Reproductive history variables were calculated for dogs prior to neutering dates (if available) or endpoint date. For certain variables, two variations were made – one that excluded entire or neutered or male or female dogs (depending on the variable) and one that included all dogs and had these excluded categories retained | | Mismating ever, reason for neutering,  Heats before neutering, number of times bred from before neutering, |
| Height, weight and body condition score (BCS) | Exam_physical.csv | Veterinarian physical examination data (height, bodyweight, Purina 9-point Body Condition Score (BCS)32 from the preceding 5 years from endpoint of haemangiosarcoma diagnosis or final record was either averaged across the 5 years or the most common (mode) BCS was reported. BCS was also classified into underweight (0-3), ideal (4-5) and overweight (6-9).  The weight and height records of dogs whose contribution to the cohort finished before 18 months old were excluded from these variables. Heights and weights were converted from inches and pounds to centimetres and kilograms and outliers more than 1.5 times outside of the interquartile range were removed. | | https://github.com/ctaylo-16/GRLS_analyses/blob/08f7bc1657d3fd3228b67d7a60868dc06275438e/Code/Creating%20HSA%20study%20population.qmd | Mean and median adult weight, height and BCS 5y prior, mode and classified BCS 5y prior |
| **Lifestyle** | | | | | |
| Activity | Activity_details_through_SY2.csv, activity_details_SY3_beyond.csv, activity_overview.csv | Owner annual questionnaire data on frequency, duration and intensity of walks and aerobic activities. Questionnaires were modified between study years (SY) 2 and 3 so not all information was captured across all years of study. Owner free-text responses about duration of activity were initially categorised then converted to a numeric category (out of 100) as below to allow for calculations. Activity level was captured consistently across all years as an ordinal variable | | https://github.com/ctaylo-16/GRLS_analyses/blob/08f7bc1657d3fd3228b67d7a60868dc06275438e/Code/GRLS%20activity%20classifcation%20method_modified.qmd | Early life average activity duration– daily USDA advised, daily activity 1h, daily activity KC 2h  Early, rest, whole and 5y prior to endpoint – average, median, mode, minimum and maximum activity levels |
| Duration free text was classified:  =<30 min, 31-60min, 61-90min, 91-120min, >120 min | =<30 min = 20  31-60min = 40  61-90min = 60  91-120min = 80  >120 min = 100 |
| Activity level: None, little, moderate, very active | None = 0  Little = 1  Moderate = 2  Very active = 3 |
| Early life exercise duration was averaged across study years and .  classified into United States Department for Agriculture (USDA) >30 min/day recommendation for dogs and the UK Kennel Club (KC) >2h/day activity recommendation for Golden Retrievers. | |
| Lifestyle | Lifestyle.csv | Owner annual questionnaire response on dog’s main lifestyle were grouped into: companion/pet, competitive, breed/showing, working, miscellaneous.  The mode lifestyle group across all study years and the 5 years prior to endpoint were also determined | | https://github.com/ctaylo-16/GRLS_analyses/blob/08f7bc1657d3fd3228b67d7a60868dc06275438e/Code/240103%20GRLS%20enviro_lifestyle.qmd | Main lifestyle category, main lifestyle category 5y prior |
| **Home/environment exposures** | | | | | |
| Socioeconomic status | Location_history.csv, <https://www.census.gov/topics/income-poverty/poverty/about/related-sites/rates.html>, [US Zip Codes Database | Simplemaps.com](https://simplemaps.com/data/us-zips) | Clinic and owner zip codes linked to county-level Federal Information Processing Standards (FIPS) codes and 2019 county-level Multideprivation Index (MDI) values (U.S Census Bureau, n.d.) | | https://github.com/ctaylo-16/GRLS_analyses/blob/08f7bc1657d3fd3228b67d7a60868dc06275438e/Code/GRLS%20clinic%20and%20deprivation%20indices%20linkup.qmd | MDI quintiles for vet clinic and owner home |
| House features | Location_history.csv, house_details.csv | Owner annual questionnaire data on house type, house location (region and urban/rural classification) and household exposures/usage (fuel and water sources, pipe type).  Annual owner responses then averaged (if binary exposure) or mode value determined for:   - Early life (from SY1-2) - Adult life/rest of life (SY3 and beyond) - Whole life (all SY records) - 5 years prior to endpoint | | https://github.com/ctaylo-16/GRLS_analyses/blob/08f7bc1657d3fd3228b67d7a60868dc06275438e/Code/240103%20GRLS%20enviro_lifestyle.qmd | House type, urban rural status, region, water source, metal pipes, plastic pipes, heating fuel source, cooking fuel source |
| Exposures | Environment_conditions.csv, environment_sleep_location.csv, environment_spend_time_location.csv | Owner annual questionnaire on environmental exposures: aerosols, air cleaners, HEPA filters, moth balls, incense/candles, smoke, hours of smoke exposure, weed killer, insecticide and fertiliser. Questionnaire data was also captured on where dogs spent their time or slept (house, garage, outside)  Annual owner responses on exposures were then aggregated for varying time points to create binary exposure variables for each environmental exposure across these time points   - Early life (from SY1-2) - Adult life/rest of life (SY3 and beyond) - Whole life (all SY records) - 5 years prior to endpoint   The most common sleep location was also calculated for these time points. | | Aerosol, air cleaner, HEPA filter, mothballs, incense/candles, weed treatment, insect treatment, fertilizer treatment, exposed to smoke, smoke exposure hours, dog sleep location (garage, house or outside), mode sleep location |
| **Comorbidities** | | | | | |
|  | Endpoints.csv, Conditions datasets (conditions_cardio.csv, conditions_dental.csv, conditions_ear_nose_throat.csv, conditions_endocrine.csv, conditions_eye.csv, conditions_gastrointestinal.csv, conditions_hematologic.csv, conditions_infectious.csv, conditions_musculoskeletal.csv, conditions_neoplasia.csv, conditions_nervous.csv, conditions_other.csv, conditions_reproductive.csv, conditions_skin.csv, conditions_urinary.csv) | An extensive list of conditions grouped by body system from annual veterinarian questionnaires were grouped in several ways for either 5 years prior to the endpoint or the dog’s whole life. For certain conditions any single record of the condition was considered to indicate it was a chronic/lifetime condition even if no further mention of it in subsequent study years e.g. Addisons disease. For other conditions, the condition must be recorded for >1 study year to be considered chronic e.g. pancreatitis.  Presence of cancer (any, benign or malignant) 5 years prior to endpoint was assessed for using annual questionnaires and the malignancy and cause of death dataset. | | https://github.com/ctaylo-16/GRLS_analyses/blob/08f7bc1657d3fd3228b67d7a60868dc06275438e/Code/GRLS%20comorbidities%20dataset.qmd  https://github.com/ctaylo-16/GRLS_analyses/blob/08f7bc1657d3fd3228b67d7a60868dc06275438e/Code/GRLS%20comorbidities%20dataset_for_HSA_RF.qmd | Chronic inflammation presence, number of comorbidities, type of comorbidities present (parasitism, infectious, immune mediated, cardiovascular, gastrointestinal, orthopaedic, other), presence of cancer (all cancers, benign, malignant), count of cancers (all cancers, benign, malignant) |
| **Intestinal Parasitism** | *giardia, hookworms, coccidia, tapeworms, whipworms, roundworms, eimeria, isospora, cryptosporidium, eimeria, tapeworms* |
| **Tick-Borne Parasitism** | *lyme_disease, anaplasma, rocky_mountain_spotted_fever, ticks, ehrlichia, lyme disease, lyme diseases, oa?, lyme/anaplasma, lyme+, anaplasma and lyme +, positive anaplasma, erlichia +, erlichia, valley_fever, babesia, anaplasma, ehrlichia, lyme_disease* |
| **Other Parasitism** | *fleas, fungal_infection, heartworm, ear_mites, other_ectoparasite, heartworm_infection* |
| **All Parasitism** | *giardia, hookworms, coccidia, tapeworms, whipworms, roundworms, eimeria, isospora, lyme_disease, anaplasma, rocky_mountain_spotted_fever, ticks, ehrlichia, lyme disease, lyme diseases, oa?, lyme/anaplasma, lyme+, anaplasma and lyme +, positive anaplasma, erlichia +, erlichia, fleas, fungal_infection, heartworm, ear_mites, heartworm_infection, other_ectoparasite* |
| **Infectious** | *leptospirosis, parvovirus, bacterial cystitis/recurrent uti, chronic uti's/bacterial cystitis, cystitis, uti, frequent utis, previous utis, history of valley fever, mma- coccidioides* |
| **Orthopaedic** | *osteoarthritis, l ccl partial tear, oa of stifle, hip dysplasia, right elbow dysplasia grade ii, ccl rupture, acl tear, tendonitis/arthritis, arthritis- cervical neck spine, lh partial ccl tear, lh iliopsoas injury, chronic lameness- hx of car accident, lameness, hypothyroidism, chronic lameness, obesity, overweight, arthritis, dvd, larpar, seizures, oa, tail fracture, broken leg, histiocytoma, osteochondritis_dissecans, intervertebral_disc_disease, lameness, musculoskeletal_pain, osteomyelitis, cruciate_ligament_rupture, hip_dysplasia, elbow_dysplasia, crepitus_decreased_range_of_motion, bone_fractures, limber_tail_syndrome, panosteitis* |
| **Immune Mediated** | *uveitis, autoimmune_thyroiditis, keratoconjunctivitis_sicca, megaesophagus, diabetes_mellitus, cushings_disease, hypothyroidism, granuloma, immune complex formation, suspected cushings/thyroid carcinoma, dvd, larpar, immune_related_musculoskeletal_disorder, rheumatoid_arthritis, diabetes_insipidus, hypothyroidism, pancreatic_insufficiency, addisons_disease, autoimmune_thyroiditis, hyperadrenalestrogenism, hypercalcemia* |
| **Cardiovascular** | *cardiomyopathy, hypertension, heart base tumor, heart base mass, mild degenerative valve disease, degenerative mitral and tricuspid valve disease, mitral valve disease, pulmonary thrombosis, portal vein thrombus, arrhythmia, atrial enlargement, cardiomegaly, cardiomyopathy, congestive_heart_failure, hypertension, murmur, lower_airway_disease, myocardial_dysfunction, pleural_effusion, pulmonic_stenosis, pneumothorax, pulmonic_stenosis, subaortic_stenosis, tachycardia, valvular_disease* |
| **Gastrointestinal** | *chronic_colitis, pancreatitis, malabsorptive_disorder, chronic pancreatitis, intermittent mixed bowel diarrhea, intermittent diarrhea - bacterial, gastric ulcers, mesenteric volvulus, fb, esophagitis, diarrhea, dietary_indiscretion, food_sensitivity, gastrointestinal_foreign_body, gastrointestinal_ulcer, intussusception, malabsorptive_disorder, megaesophagus* |
| **Inflammatory Other** | *tracheobronchitis, hypercalcaemia, pigmentary_uveitis, ear infections, chronic pyoderma, chronic pruritis, chronic rhinitis/nasal discharge, allergy, obesity, pruritis, severe allergies, atopy, allergies, chronic otitis, chronic hot spots, skin infections, many pyoderma/dermatitis events, chronic otitis, allergic dermatitis, dermatitis, food allergy, skin allergies, chronic otitis, overweight, atopic dermatitis, allergies, seasonal allergies/pyoderma, chronic otitis, chronic allergies, dermatitis lip fold, anal sac infection, otitis_externa, otitis_media, aural_haematoma, aural_foreign_body, pharyngitis, rhinitis, hypercalcaemia, keratoconjunctivitis_sicca, hypercalcemia, influenza, parvovirus* |
| **Chronic Inflammatory** | *congestive_heart_failure, cardiomyopathy, hypertension, heartworm_infection, lower_airway_disease, dental_tarter_calculus, addisons_disease, autoimmune_thyroiditis, cushings_disease, diabetes_insipidus, diabetes_mellitus, hyperadrenalestrogenism, hypercalcemia, hypothyroidism, pancreatic_insufficiency, keratoconjunctivitis_sicca, pigmentary_uveitis, uveitis, chronic_colitis, malabsorptive_disorder, megaesophagus, pancreatitis, anaplasma, babesia, canine_herpesvirus, coccidia, cryptosporidium, ear_mites, ehrlichia, eimeria, fleas, fungal_infection, giardia, granuloma, hookworms, influenza, isospora, leptospirosis, lyme_disease, other_ectoparasite, parvovirus, rocky_mountain_spotted_fever, roundworms, tapeworms, ticks, tracheobronchitis, unspecified_gastrointestinal_parasite, valley_fever, whipworms, immune_related_musculoskeletal_disorder, osteoarthritis, rheumatoid_arthritis, laryngeal_paralysis, meningitis, meningoencephalitis, myasthenia_gravis, erythema_multiforme, flea_allergy_dermatitis, food_allergy_dermatitis, r_o_atopy* |
| **All cancers** | *adrenal_tumor, basal_cell_tumor, bile_duct_tumor, bladder_tumor, brain_spinal_cord_tumor, breast_or_mammary_tumor, eye_tumor, hair_matrix_tumor, heart_tumor, histiocytic_sarcoma, kidney_tumor, liver_tumor, lung_tumor, lymphoma, mast_cell_tumor, melanmoma, multiple_myeloma, nasal_tumor, osteosarcoma, pancreatic_tumor, perianal_adenoma, pituitary_tumor, plasma_cell_tumor, plasmacytoma, prostate_tumor, soft_tissue_sarcoma, splenic_tumor, squamous_cell_carcinoma, stomach_intestinal_tumor, testicular_tumor, thymoma, thyroid_tumor* |
| **Malignant cancers** | *histiocytic_sarcoma, lymphoma, melanoma, multiple_myeloma, osteosarcoma, pancreatic_tumor, plasma_cell_tumor, plasmacytoma, soft_tissue_sarcoma, squamous_cell_carcinoma* |
| **Benign cancers** | *adrenal tumor, basal cell tumor, bile duct tumor, bladder tumor, brain spinal cord tumor, breast or mammary tumor, eye tumor, hair matrix tumor, heart tumor, kidney tumor, liver tumor, lung tumor, mast cell tumor, nasal tumor, perianal adenoma, pituitary tumor, prostate tumor, splenic tumor, stomach intestinal tumor, testicular tumor, thymoma, thyroid tumor* |
| **Medications** | | | | | |
| Medications | Medications.csv | Medication usage from annual veterinarian and owner questionnaires were grouped into therapeutic indication according to the NOAH compendium Datasheets (National Office of Animal Health, n.d.).  Drug class usage was then split into quartiles (or halves where there was not enough variability in prescription numbers between dogs) for lifetime and 5y prior to endpoint usage | | https://github.com/ctaylo-16/GRLS_analyses/blob/08f7bc1657d3fd3228b67d7a60868dc06275438e/Code/medication%20prescribed%20frequency%20with%20time%20points.qmd | Lifetime usage and 5 years prior to endpoint of: antihistamines, anti-inflammatories, antimicrobials, antiparasites, antiseptics, cardiorespiratory medication, dietary supplementation, diuretics, enteric medication, fluid metabolites, horomones, immunologicals, miscellaneous drugs, neurological drugs  Usage ever and 5y prior to endpoint of: NSAIDs, steroids and fenbendazole |
| **Anti-histamines** | *"diphenhydramine", "hydroxyzine", "trimeprazine tartrate, prednisone", "cetirizine", "loratadine", "chlorphenamine", "meclizine", "clemastine fumarate", "dimenhydrinate", "fexofenadine", "diphenhydramine", "loratadine", "cetirizine", "hydroxyzine", "chlorpheniramine", "desloratadine", "cetirizine"* |
| **Anti-inflammatory** | *"carprofen", "prednisone", "meloxicam", "deracoxib", "grapiprant", "dexamethasone", "firocoxib", "predisolone acetate", "trimeprazine tartrate, prednisone", "triamcinolone acetonide", "diclofenac", "methylpredisolone", "hydrocortisone, gentamicin sulfate, miconazole nitrate", "ketorolac", "budesonide", "burow's solution, hydrocortisone", "dexamethasone, miconazole nitrate  ", "dimethyl sulfoxide, fluocinolone acetonide", "flurbiprofen", "piroxicam", "hydrocortisone", "dexamethasone, enrofloxacin, ketoconazole, tris-edta", "beclomethasone, clotrimazole, neomycin sulfate", "dexamethasone, ketoconazole, tris-edta", "ketoprofen", "acetic acid, boric acid, ceramide complex, hydrocortisone, ketoconazole", "betamethasone", "ketotifen", "mometasone furoate", "robenacoxib", "dexamethasone", "flunixin", "betamethasone", "hydrocortisone", "prednisolone", "methylprednisolone", "triamcinolone acetonide", "difluprednate", "fluticasone", "burow's solution", "carprofen", "dexamethasone", "prednisolone acetate", "hydroxyzine", "diphenhydramine", "dexamethasone, miconazole nitrate", "amikacin sulfate, dexamethasone", "dexamethasone, methylprednisolone", "meclizine", "clemastine fumarate", "desmopressin acetate", "chlorphenamine", "sevelamer", "loratadine", "fexofenadine", "dexamethasone, triamcinolone acetonide", "hydrocortisone, ketoconazole", "hydroxyethyl starch, sodium chloride", "dexamethasone, ketoconazole, phytosphingosine", "miconazole nitrate, salicylic acid", "dexamethasone, diphenhydramine", "betamethasone, clotrimazole, gentamicin sulfate, mometasone furoate", "dimethyl sulfoxide, fluocinolone acetonide, gentamicin sulfate, miconazole nitrate", "dimethyl sulfoxide, flunixin, fluocinolone acetonide", "hydrocortisone, troleandomycin", "Dimenhydrinate", "Dexamethasone", "Betamethasone", "Mibolerone", "nepafenac", "dexamethasone", "betamethasone", "hydrocortisone", "butorphanol tartrate", "dimethyl sulfoxide", "menthol, hydrocortisone", "dexamethasone, ketoconazole", "dexamethasone, enrofloxacin", "dexamethasone, dimethyl sulfoxide, enrofloxacin, lidocaine", "dexamethasone, enrofloxacin, ketoconazole", "dexamethasone, penicillin", "dexamethasone, tobramycin", "betamethasone, ofloxacin", "chloramphenicol, dexamethasone", "betamethasone, chloramphenicol, ketoconazole", "enrofloxacin, dexamethasone, tris-edta", "dexamethasone, miconazole nitrate, neomycin sulfate, nystatin, thiostrepton, triamcinolone acetonide", "betamethasone, burow's solution, gentamicin sulfate, hydrocortisone, miconazole nitrate", "ketoconazole, hydrocortisone", "bacitracin, hydrocortisone", "dexamethasone, miconazole nitrate, tris-edta", "chlorhexidine gluconate, dexamethasone", "dexamethasone, enrofloxacin, tris-edta", "dexamethasone, enrofloxacin, silver sulfadiazine", "dexamethasone, miconazole nitrate, neomycin sulfate, polymyxin b, prednisolone acetate, thiabendazole", "betamethasone, enrofloxacin", "dexamethasone, ear cleaner (epi-otic advanced), enrofloxacin", "betamethasone, tobramycin"* |
| **Anti-microbial** | *"metronidazole", "cephalexin", "cefpodoxime proxetil", "amoxicillin, clavulanate potassium", "clotrimazole, gentamicin sulfate, mometasone furoate", "doxycycline", "amoxicillin", "betamethasone, clotrimazole, gentamicin sulfate", "enrofloxacin", "betamethasone, gentamicin sulfate", "clindamycin", "dexamethasone, neomycin sulfate, polymyxin b", "florfenicol, mometasone furoate, terbinafine", "mometasone furoate, orbifloxacin, posaconazole", "sulfadimethoxine", "tylosin tartrate", "isoflupredone acetate, neomycin sulfate, tetracaine", "ketoconazole", "ketoconazole, tris-edta", "bacitracin zinc, neomycin sulfate, polymyxin b", "dexamethasone, neomycin sulfate, thiabendazole", "ciprofloxacin", "enrofloxacin, ketoconazole, triamcinolone acetonide", "marbofloxacin", "mupirocin", "betamethasone, florfenicol, terbinafine", "sulfamethoxazole, trimethoprim", "cefovecin", "miconazole nitrate, polymyxin b, prednisolone acetate", "ampicillin", "miconazole nitrate", "fluconazole", "minocycline", "tobramycin", "hydrocortisone, gentamicin sulfate, miconazole nitrate", "cefazolin", "ofloxacin", "gentamicin sulfate, hydrocortisone, miconazole nitrate", "azithromycin", "acetic acid, chlorhexidine gluconate, ketoconazole", "bacitracin zinc, hydrocortisone, neomycin sulfate, polymyxin b", "enrofloxacin, silver sulfadiazine", "chlorhexidine gluconate, ketoconazole, phytosphingosine", "bacitracin zinc, dexamethasone, neomycin sulfate, polymyxin b", "chlorhexidine gluconate, miconazole nitrate", "chlorhexidine gluconate, miconazole nitrate, tris-edta", "gentamicin sulfate", "ormetoprim, sulfadimethoxine", "acetic acid, boric acid, hydrocortisone, ketoconazole", "penicillin", "ampicillin, sulbactam", "sulfamethoxazole", "chloramphenicol", "oxytetracycline, polymyxin b", "ceftiofur sodium", "sulfadiazine, trimethoprim", "chloroxylenol, ketoconazole", "dexamethasone, enrofloxacin, miconazole nitrate", "ketoconazole, phytosphingosine", "sulfadimidine, trimethoprim", "neomycin sulfate, polymyxin b, gramicidin", "orbifloxacin", "chlorhexidine gluconate, phytosphingosine", "nitrofurantoin", "penicillin g", "beclomethasone, clotrimazole, neomycin sulfate", "dexamethasone, ketoconazole, tris-edta", "neomycin", "penicillin g procaine", "acetic acid, boric acid, ceramide complex, hydrocortisone, ketoconazole", "ketoconazole, triamcinolone acetonide", "amikacin sulfate", "dimethyl sulfoxide, enrofloxacin, fluocinolone acetonide", "meropenem", "amforol", "bacitracin zinc, neomycin sulfate, polymyxin b, unspecified steroid", "ceftazidime", "enrofloxacin", "miconazole nitrate", "triamcinolone acetonide", "polymyxin b", "povidone-iodine", "trimethoprim", "unspecified antibiotic", "ceftiofur", "cephalosporin", "ciprofloxacin", "chloramphenicol", "gentamicin sulfate", "ofloxacin", "bacitracin zinc", "bacitracin", "neomycin sulfate", "nystatin", "tetracycline", "erythromycin", "rifampin", "amoxicillin", "amikacin sulfate", "clotrimazole", "miconazole nitrate", "ketoconazole", "fluconazole", "nystatin", "terbinafine", "itraconazole", "griseofulvin", "enrofloxacin, tris-edta", "enrofloxacin, tobramycin", "enrofloxacin, ketoconazole, neomycin sulfate", "chloramphenicol, neomycin sulfate, nystatin, thiostrepton, triamcinolone acetonide", "enrofloxacin, triamcinolone acetonide", "clotrimazole, dexamethasone, enrofloxacin", "clotrimazole, dexamethasone", "enrofloxacin, ketoconazole", "gentamicin sulfate, ketoconazole", "chlorhexidine gluconate, enrofloxacin, tris-edta", "chloroxylenol, salicylic acid, sodium thiosulfate", "Chloramphenicol", "Amikacin sulfate", "Gentamicin sulfate", "Enrofloxacin", "Neomycin sulfate", "Nystatin", "Penicillin", "Miconazole nitrate", "Clotrimazole", "Ofloxacin", "amikacin sulfate", "gentamicin sulfate", "miconazole nitrate", "enrofloxacin", "ofloxacin", "gentamicin sulfate, miconazole nitrate", "chloramphenicol", "penicillin", "oseltamivir", "florfenicol", "ketoconazole", "mupirocin", "nystatin", "triamcinolone acetonide", "ofloxacin, unspecified nsaid", "amikacin sulfate, miconazole nitrate", "amikacin sulfate, gentamicin sulfate, triamcinolone acetonide", "penicillin g benzathine, penicillin g procaine", "neomycin sulfate, tetracaine , triamcinolone acetonide", "enrofloxacin, miconazole nitrate, triamcinolone acetonide", "itraconazole, ketoconazole, triamcinolone acetonide", "ketoconazole, neomycin sulfate, nystatin, thiostrepton, triamcinolone acetonide, tris-edta", "betamethasone, ofloxacin", "piroctone olamine", "chloramphenicol, dexamethasone", "ketoconazole, mupirocin, triamcinolone acetonide", "clotrimazole, enrofloxacin, triamcinolone acetonide", "betamethasone, chloramphenicol, ketoconazole", "voriconazole", "enrofloxacin, dexamethasone, tris-edta", "dexamethasone, miconazole nitrate, neomycin sulfate, nystatin, thiostrepton, triamcinolone acetonide", "betamethasone, burow's solution, gentamicin sulfate, hydrocortisone, miconazole nitrate", "ketoconazole, hydrocortisone", "enrofloxacin, ketoconazole, tris-edta", "ketoconazole, sodium hypochlorite", "moxifloxacin", "neomycin sulfate, nystatin", "attapulgite, bismuth subsalicylate, kanamycin", "bacitracin zinc, miconazole nitrate, polymyxin b", "neomycin sulfate, nystatin, triamcinolone acetonide", "ciprofloxacin, ketoconazole, triamcinolone acetonide", "chloramphenicol, ketoconazole, triamcinolone acetonide", "potentiated sulfonamides", "kaolin, neomycin sulfate, pectin", "cefadroxil", "dexamethasone, enrofloxacin, tris-edta", "fenbendazole, maropitant citrate, metronidazole, omeprazole, sucralfate", "dexamethasone, enrofloxacin, silver sulfadiazine", "dexamethasone, miconazole nitrate, neomycin sulfate, polymyxin b, prednisolone acetate, thiabendazole", "betamethasone, enrofloxacin", "dexamethasone, ear cleaner (epi-otic advanced), enrofloxacin", "betamethasone, tobramycin"* |
| **Anti-parasites** | *"ivermectin, pyrantel pamoate", "afoxolaner", "lufenuron, milbemycin oxime", "ivermectin", "milbemycin oxime", "fluralaner", "fipronil, (s)-methoprene", "milbemycin oxime, spinosad", "neomycin sulfate, nystatin, thiostrepton, triamcinolone acetonide", "TRUE", "dinotefuran, permethrin, pyriproxyfen", "imidacloprid, pyriproxyfen", "sarolaner", "milbemycin oxime, praziquantel", "ivermectin, praziquantel, pyrantel pamoate", "selamectin", "flumethrin, imidacloprid", "moxidectin", "lufenuron, milbemycin oxime, praziquantel", "spinosad", "fipronil, permethrin, pyriproxyfen", "febantel, praziquantel, pyrantel pamoate", "imidacloprid, permethrin", "praziquantel", "praziquantel, pyrantel pamoate", "imidacloprid, moxidectin", "fipronil, pyriproxyfen, (s)-methoprene", "fipronil", "lotilaner", "lufenuron", "cyphenothrin, fipronil", "ponazuril", "cyphenothrin, fipronil, (s)-methoprene", "clorsulon, ivermectin", "imidacloprid", "nitenpyram", "terbinafine", "indoxacarb", "deltamethrin", "(s)-methoprene", "mebendazole", "itraconazole", "fipronil, permethrin", "unspecified heartworm preventative", "amitraz", "epsiprantel", "permethrin", "afoxolaner, milbemycin oxime", "indoxacarb, permethrin", "permethrin, pyriproxyfen", "dinotefuran", "ivermectin, lufenuron, mebendazole, praziquantel, pyrantel pamoate", "febantel", "milbemycin oxime", "moxidectin", "fenbendazole", "praziquantel", "pyrantel pamoate", "oxantel", "diethylcarbamazine citrate", "amitraz", "permethrin", "imidacloprid", "fipronil", "etofenprox", "selamectin", "pyriproxyfen", "s-methoprene", "diatomaceous earth", "nitenpyram", "amitraz, metaflurimon", "etofenprox, (s)-methoprene, piperonyl butoxide", "etofenprox, n-octyl bicycloheptene dicarboximide, piperonyl butoxide, pyriproxyfen, (s)-methoprene", "unspecified herbal flea/tick preventative", "unspecified flea/tick preventative", "Ivermectin", "milbemycin oxime", "oxantel", "praziquantel", "moxidectin", "pyrantel pamoate", "sarolaner", "unspecified parasite preventative", "moxidectin, pyrantel pamoate, sarolaner", "milbemycin oxime, oxantel, praziquantel", "fatal plus", "unspecified flea preventative", "toltrazuril", "mebendazole, praziquantel, pyrantel pamoate", "imidacloprid, permethrin, pyriproxyfen", "fenbendazole, maropitant citrate, metronidazole, omeprazole, sucralfate"* |
| **Anti-septics** | *"chlorhexidine gluconate", "chlorhexidine gluconate, ophytrium", "chlorhexidine gluconate, ketoconazole", "chlorhexidine gluconate, climbazole, phytosphingosine", "chlorhexidine gluconate, tris-edta", "chlorhexidine gluconate, ketoconazole, tris-edta", "chlorhexidine gluconate, hydrocortisone, tris-edta", "chloroxylenol, lactic acid, salicylic acid", "colloidal silver", "chloroxylenol, salicylic acid, sodium thiosulfate", "Silver sulfadiazine", "Gentian violet", "Boric acid", "silver sulfadiazine", "hydrogen peroxide", "chlorhexidine gluconate", "silver sulfadiazine, insulin", "ceramide iii, chlorhexidine gluconate, microsilver", "boric acid, gentian violet, silver sulfadiazine", "polyvinyl alcohol, povidone", "benzoyl peroxide, salicylic acid", "unspecified antiseptic", "chlorhexidine gluconate, dexamethasone", "benzoic acid, chlorhexidine gluconate, malic acid, salicylic acid", "benzoyl peroxide, phytosphingosine, salicylic acid, sulfur"* |
| **Anti-virals** | *"imatinib", "interferon alfa", "acyclovir", "valacyclovir", "zidovudine", "oseltamivir", "acyclovir"* |
| **Cardio-respiratory** | *"pimobendan", "dextromethorphan hydrobromide, guaifenesin", "enalapril", "homatropine, hydrocodone", "benazepril hcl", "amlodipine", "sotalol", "spironolactone", "prazosin", "clopidogrel", "mexiletine", "sildenafil", "dextromethorphan hydrobromide", "guaifenesin", "albuterol sulfate", "pentoxifylline", "theophylline", "timolol", "amiodarone", "lidocaine", "mexiletine", "propranolol", "terbutaline", "oxygen", "diltiazem", "Epoetin alfa-epbx", "Tyrosine", "pseudoephedrine", "dimenhydrinate", "dextromethorphan, guaifenesin", "aminocaproic acid", "clonidine"* |
| **Dietary supplements** | *"probiotic", "omega 3", "joint supplement (chondroitin sulfate/glucosamine hcl/msm)", "joint supplement (chondroitin sulfate/glucosamine hcl)", "digestive supplement", "multivitamin", "butorphanol tartrate", "vitamin b", "joint supplement (glucosamine hcl/msm)", "taurine", "liver supplement", "joint supplement (glucosamine hcl)", "urinary tract supplement", "yunnan baiyao", "prebiotic, probiotic", "joint supplement (other)", "immune support supplement", "calming supplement", "vitamin c", "skin and coat supplement", "vision supplement", "vitamin d", "cisapride", "l-carnitine", "joint supplement (chondroitin sulfate)", "vitamin k", "kidney health supplement", "vitamin e", "melatonin", "thyroid support supplement", "liver happy", "omega 3-6-9", "shen calmer", "turmeric", "calcium", "niacinamide", "l-asparaginase", "unspecified supplement", "vitamin a", "wei qi booster", "coenzyme q10", "curcumin", "dl-methionine", "flaxseed", "joint supplement (msm)", "kelp", "omega 3-6", "acetylcysteine", "anal gland supplement", "coprophagia supplement", "digestive supplement, joint supplement (glucosamine hcl/msm), probiotic, skin and coat supplement, vitamins and minerals", "joint supplement (chondroitin sulfate/glucosamine hcl/msm), multivitamin", "seasonal and environmental allergy supplement", "unspecified herbal supplement", "cardiac support supplement", "cognitive supplement", "garlic", "joint supplement (other), skin and coat supplement", "lung supplement", "digestive supplement", "prebiotic", "probiotic", "immune support supplement", "silymarin", "milk thistle", "colostrum", "echinacea", "reishi mushroom", "astragalus", "high calorie nutritional supplement", "gallbladder function supplement", "joint supplement (glucosamine hcl)", "omega 3", "puppy growth supplement", "lutein supplement", "vitamin E", "biotin", "selenium", "zinc", "iron", "magnesium citrate", "nourish essence formula", "ca support", "bee pollen", "brewers yeast, garlic", "xiao chai hu jia qin jiao tang", "liu jun zi tang", "yi zhi ren", "bitter melon", "spinal support supplement", "mangosteen extract", "shu jin i", "juan bi 1", "amylase, lipase, protease", "cognitive supplement, liver supplement", "musculoskeletal supplement", "hairball control supplement", "wheat germ", "gm np hsa formula", "cognitive supplement, liver supplement", "unspecified thyroid medication or supplement", "Sodium carboxymethylcellulose", "Ba Zheng Wan", "Jin Gui Shen Qi Wan", "Digestive supplement, prebiotic, probiotic", "General female health supplement", "Strengthen metal", "Gather vitality", "Xue Fu Zhu Yu Tang", "Bilberry", "Puppy supplement", "Digestive supplement, immune support supplement, skin and coat supplement", "Silver sulfadiazine, insulin", "Squalane", "Chitosan", "Ashwagandha", "Homeopathic vaccine spray", "Sulforaphane producing supplement", "Liu Wei Di Huang Wan", "Vitamin-iron supplement", "Fenofibrate", "Mibolerone", "Corneal repair", "Slippery elm", "Jia Wei Xue Fu Zhu Yu Tang", "Viscoadaptive hyaluronan", "Rx diet - weight management", "Epoetin alfa-epbx", "Geraniol", "Tyrosine", "Aluminium hydroxide, magnesium hydroxide", "Phytosphingosine, pramoxine", "Slippery elm", "Sodium carboxymethylcellulose", "Ba Zheng Wan", "Jin Gui Shen Qi Wan", "Digestive supplement, prebiotic, probiotic", "General female health supplement", "Strengthen metal", "Gather vitality", "Xue Fu Zhu Yu Tang", "Bilberry", "Puppy supplement", "Digestive supplement, immune support supplement, skin and coat supplement", "Squalane", "Chitosan", "Ashwagandha", "Homeopathic vaccine spray", "Sulforaphane producing supplement", "Liu Wei Di Huang Wan", "Vitamin-iron supplement", "sodium carboxymethylcellulose", "unspecified herbal thyroid support supplement", "digestive supplement, prebiotic, probiotic", "unspecified digestive medication", "puppy supplement", "digestive supplement, immune support supplement, skin and coat supplement", "general female health supplement", "strengthen metal", "xue fu zhu yu tang", "bilberry", "tear stain supplement", "magnesium", "sulforaphane producing supplement", "slippery elm", "vitamin-iron supplement", "chitosan", "vitamin-iron supplement", "geranium oil, lavender oil, neem oil, peppermint oil, yarrow", "ashwagandha", "gexia-zhuyu tang", "gather vitality", "squalane", "diatomaceous earth, neem oil, yarrow", "gexia-zhuyu tang", "joint supplement (chondroitin sulfate/msm)", "medium-chain triglycerides", "joint supplement (unspecified)", "colon supplement", "cbd or hemp oil, joint supplement (unspecified)", "stomach happy", "tyrosine", "spleen support supplement", "testicular health supplement", "endocrine system support", "unspecified vitamin", "gut restore supplement", "apoptosis supplement", "vitamin b, vitamin b complex, vitamin b12, vitamin e", "palmitoylethanolamide", "chondroitin sulfate, hyaluronic acid, n-acetyl-d-glucosamine, triamcinolone acetonide", "graviola", "pancreatic enzyme supplement", "rx diet - aging care", "l-lysine", "joint supplement (glucosamine hcl), omega 3", "ba zheng wan", "jin gui shen qi wan", "ku shen si wu", "jade windscreen", "liu wei di huang wan", "xiang lian san", "jing tang max's formula", "jia wei xue fu zhu yu tang", "long dan xie gan wan", "di tan tang"* |
| **Diuretics** | *“Furosemide”* |
| **Enteric** | *"maropitant citrate", "famotidine", "sucralfate", "omeprazole", "metoclopramide", "ondansetron", "apomorphine hcl", "ursodiol", "mirtazapine", "loperamide", "ranitidine", "activated charcoal, bismuth subsalicylate, kaolin, pectin", "pantoprazole", "activated charcoal", "bismuth subsalicylate", "lactulose", "simethicone", "activated charcoal, kaolin", "activated charcoal, kaolin, sorbitol", "activated charcoal, sorbitol", "apple cider vinegar", "dolasetron", "metoclopramide", "ondansetron", "cerenia", "maropitant citrate", "crofelemer", "cimetidine", "aluminium hydroxide, magnesium hydroxide, simethicone", "diphemanil metilsulfate", "aluminium hydroxide"* |
| **Fluid and metabolites** | *"lactated ringer's solution", "plasma-lyte", "electrolyte injection", "sodium chloride", "dextrose", "whole blood transfusion", "iron dextran", "platelet transfusion", "donor lymphocyte infusion (dli)", "hydroxyethyl starch, sodium chloride", "potassium chloride", "plasma", "magnesium", "potassium chloride", "sodium chloride", "calcium carbonate", "saline", "hypertonic saline", "unspecified fluid therapy", "phosphorus", "sodium"* |
| **Hormones and related** | *"levothyroxine", "thryoxine", "diethylstilbestrol", "oxytocin", "trilostane", "estriol", "pyridostigmine bromide", "finasteride", "aglepristone", "nph insulin", "megestrol acetate", "cabergoline", "thyroxine", "fludrocortisone", "leflunomide", "paroxetine", "metformin", "desmopressin acetate", "cosyntropin", "bethanechol", "epinephrine", "pamidronate", "thiamazole", "Silver sulfadiazine, insulin", "Epoetin alfa-epbx", "insulin", "epoetin alfa-epbx", "melatonin", "oxytocin", "progesterone", "dinoprost tromethamine", "silver sulfadiazine, insulin", "mibolerone", "fuzapladib sodium", "misoprostol"* |
|  | *"gabapentin", "tramadol", "trazodone", "acepromazine", "fluoxetine", "dexmedetomidine", "propofol", "alprazolam", "levetiracetam", "phenobarbital", "buprenorphine", "ketamine", "diazepam", "midazolam", "hydromorphone", "zonisamide", "hydrocodone", "isoflurane", "capromorelin", "amantadine", "potassium bromide", "atipamezole", "morphine", "tiletamine, zolazepam", "clomipramine", "codeine", "fentanyl", "methadone", "lidocaine", "amitriptyline", "diphenoxylate", "pramoxine", "sevoflurane", "bupivacaine", "glycopyrrolate", "alfaxalone", "aminopentamide hydrogen sulfate", "trimeprazine tartrate", "acepromazine, atropine sulfate, butorphanol tartrate", "acepromazine, hydromorphone", "acepromazine, ketamine", "acetaminophen", "acetaminophen, hydrocodone", "oxycodone", "sertraline", "xylazine", "butorphanol tartrate", "gabapentin", "acetaminophen", "methadone", "buprenorphine", "hydromorphone", "tramadol", "fentanyl", "buspirone", "paroxetine", "doxepin", "clonazepam", "lorazepam", "sertraline", "escitalopram", "fluoxetine", "amitriptyline", "mirtazapine", "butorphanol tartrate, dexmedetomidine", "ketamine, xylazine", "pregabalin", "belladonna alkaloids, phenobarbital", "Clorazepate", "dimethyl sulfoxide", "clorazepate", "butorphanol tartrate", "betamethasone, gentamicin sulfate, miconazole nitrate", "tramadol", "gabapentin", "diazepam", "carbamazepine", "phenobarbital", "bupivacaine, lidocaine", "phenobarbital, potassium bromide", "butorphanol tartrate, dexmedetomidine, tiletamine, zolazepam", "menthol, lidocaine", "hydrocortisone, pramoxine", "felbamate", "gabapentin, trazodone"* |
| **Immunologicals** | *"oclacitinib", "lokivetmab", "bedinvetmab", "cyclosporine", "chlorambucil", "cyclophosphamide", "doxorubicin", "azathioprine", "vincristine", "sulfasalazine", "lomustine", "mycophenolate mofetil", "tacrolimus", "anti-cd52 monoclonal antibodies", "procarbazine", "vinblastine", "melphalan", "carboplatin", "temozolomide", "dactinomycin", "cyclophosphamide", "doxorubicin", "vincristine", "cisplatin", "melanoma vaccine", "egft/her2", "imatinib", "chop protocol (cyclophosphamide/doxorubicin/prednisone/vincristine)", "trametinib", "lapatinib", "elspar", "vorinostat", "verdinexor", "vinorelbine", "masitinib", "tigilanol tiglate"* |
| **Miscellaneous** | *"polysulfated glycosaminoglycan", "phenylpropanolamine", "methocarbamol", "ear cleaner (epi-otic advanced)", "ear cleaner (zymox), hydrocortisone", "atropine sulfate", "allergy immunotherapy - unspecified", "ear cleaner (zymox)", "toothpaste/dental health solution or chews", "acetic acid, boric acid", "unspecified medication", "cbd or hemp oil", "allergy immunotherapy - drops", "allergy immunotherapy - injection", "telmisartan", "phytosphingosine", "carvacrol", "dorzolamide, timolol", "coconut oil", "latanoprost", "silver sulfadiazine", "toceranib", "unspecified thyroid medication", "unspecified otic ear pack", "aspirin", "atropine sulfate, diphenoxylate", "acetaminophen, codeine", "arnica", "hypochlorous acid", "tris-edta", "tropicamide", "benzocaine", "ophytrium", "edta", "unspecified shampoo/mousse", "barium", "body sore", "phytosphingosine, salicylic acid", "carbomer, cetrimide, deionized water, disodium edta, sodium hydroxide, sorbitol", "propylene glycol, salicylic acid", "benzoyl peroxide", "dorzolamide", "rx diet - digestive support", "oxymetazoline", "aconite, arnica, belladona, calendula, chamomile, daisy, echinacea, hepar sulphur, hypericum perforatum, mercurius solubilis, millefolium, symphytum*  *officinale, witch hazel", "algae", "allopurinol", "aloe vera", "menthol", "rx diet - hypoallergenic hydrolyzed protein", "sirolimus", "unspecified ear cleaner", "algae", "burow's solution", "corneal reapir", "pentosan polysulfate", "pilocarpine", "polyethylene glycol", "unspecified ear medication", "amino acid", "burow's solution, hydrocortisone, miconazole nitrate", "cedarwood oil, rosemary oil, sesame", "staphylococcus aureus phage lysate", "plasma-derived immunoglobulin", "platelet-rich plasma (prp) injections", "growth factor supplement", "microcurrent therapy", "laser therapy", "clinical trial - cancer prevention vaccine", "unspecified vaccine", "Aluminium hydroxide, magnesium hydroxide", "Fenofibrate", "Phytosphingosine", "Pramoxine", "Viscoadaptive hyaluronan", "Mibolerone", "Dimethyl sulfoxide", "transcranial magnetic stimulation (tms)", "Chitosan", "Homeopathic vaccine spray", "methazolamide", "attapulgite, bismuth subcarbonate, kanamycin a", "dilute bleach solution", "stasis breaker", "unspecified astringent", "rattlesnake antivenin", "homeopathic vaccine spray", "unspecified", "unspecified otic ointment", "unspecified otic flush", "external wind", "unspecified eye dilation drops", "unspecified allergy medication", "over-the-counter antipruritic/astrigent", "over-the-counter wound dressing", "unspecified vision supplement", "unspecified eye medication", "over-the-counter unmedicated shampoo/mousse", "unspecified wipes", "unspecified wipes", "rx diet - weight management", "sodium hypochlorite", "unspecified eye drops", "liquid bandage", "ear cleaner (aloeclens)", "ear cleaner (oticlean a)", "unspecified antiseptic ointment", "hypericum", "wind toxin", "niosomes", "viscoadaptive hyaluronan", "amforal", "rv1001", "shu jin huo luo", "phytosphingosine", "prochlorperazine", "coal tar solution, menthol, salicylic acid", "unspecified chemotherapy", "hyaluronic acid", "ceramide complex, coconut oil, safflower", "ear cleaner (otirinse)", "bordetella bronchiseptica", "hydroquinone, mometasone furoate, tretinoin", "cassia bark, colloidal silicon dioxide, clove, eucalyptus, isopropyl myristrate, lanolin, mineral oil, origanum, vitamin e, white petrolatum", "manganese", "magnolia bark", "dental sealant", "lotion or leave in conditioner", "diatomaceous earth, geranium oil, lavender oil, neem oil, peppermint oil, yarrow", "four marvels", "gui pi tang", "fu zheng support", "unspecified analgesic", "cedarwood oil, eucalyptus, geranium oil, rosemary oil", "stem cells", "corneal repair", "ocular repair gel", "fenofibrate", "ear cleaner (oti-soothe)", "ferrum metallicum", "naphazoline, pheniramine maleate", "xiao chai hu tang", "geraniol", "paw protection wax", "aluminium hydroxide, magnesium hydroxide", "ear cleaner (animal pharmaceuticals)", "phytosphingosine, pramoxine", "pramoxine, phytosphingosine", "damp heat", "fenugreek, lemon balm, mint, neem oil, seaweed", "loranthus formula", "junpier", "tamarix dioica", "potassium gluconate", "unspecified atopy medication", "antioxidant", "citronella, geranium oil, lemongrass oil, peppermint oil", "ear cleaner (oxyfresh)", "catnip, cedarwood oil, citronella, erigeron, eucalyptus, geraniol, neem oil, rosemary oil, witch hazel", "papaya", "rx clay", "tranexamic acid", "epsom salt", "silver oxide, type i collagen", "dapagliflozin", "benzethonium chloride, lidocaine", "qing ying tang", "schisandra", "borage oil", "burow's solution, miconazole nitrate", "cinnamon, lemongrass oil, peppermint oil, thyme", "olive oil", "ear astringent (vedco)", "unspecified herbal wart remover", "natural wart remover", "ear cleaner (protonix)", "unspecified rx diet", "ear cleaner (epi-otic advanced), ketoconazole", "bu yang huan wu", "benzocaine, resorcinol", "viola clear fire", "grapefruit seed extract, lavender oil, noni fruit", "castor oil, cinnamon, lemongrass oil, sesame", "walnut oil", "ear cleaner (nutri-vet)", "ear cleaner (aurocin)", "cedarwood oil, peppermint oil", "ear cleaner (well and good)", "unspecified eye lubricant", "zoledronic acid", "iopromide", "mycobacterium cell wall fraction (mcwf) immunostimulant", "cholestyramine", "dextran, glycerin, hypromellose", "lyssin", "juniper", "rx diet - renal health", "rx diet - selected protein (duck)", "rx diet - skin and food sensitivity", "rx diet - gi low fat", "rx diet - food sensitivities", "rx diet - gi low fat", "other"* |
